# Supplementary material for: Type 2 Diabetes Modifies Skeletal Muscle Gene Expression Response to Gastric Bypass Surgery
Source: bioRxiv preprint, doi:10.1101/2021.01.19.427352, version 1 (2021-01-19)
Supplement: Supplemental Table 1 [file 427352_file05.xlsx]

## Sheet: Supplementary 1
Column #	Probeset ID	Entrez Gene	Gene Symbol	Gene Title	RefSeq Transcript ID	p-value(Timepoint)	p-value(Diabetic/Non-Diabetic)	p-value(Age)	p-value(BMI)	p-value(Timepoint * Diabetic/Non-Diabetic)	Mean(Post * Diabetic)	Std(Post * Diabetic)	Mean(Post * Non-Diabetic)	Std(Post * Non-Diabetic)	Mean(Pre * Diabetic)	Std(Pre * Diabetic)	Mean(Pre * Non-Diabetic)	Std(Pre * Non-Diabetic)	p-value(Pre * Diabetic vs. Pre * Non-Diabetic)	Ratio(Pre * Diabetic vs. Pre * Non-Diabetic)	Fold-Change(Pre * Diabetic vs. Pre * Non-Diabetic)	Fold-Change(Pre * Diabetic vs. Pre * Non-Diabetic) (Description)	T(Pre * Diabetic vs. Pre * Non-Diabetic)	p-value(Post * Diabetic vs. Pre * Diabetic)	Ratio(Post * Diabetic vs. Pre * Diabetic)	Fold-Change(Post * Diabetic vs. Pre * Diabetic)	Fold-Change(Post * Diabetic vs. Pre * Diabetic) (Description)	T(Post * Diabetic vs. Pre * Diabetic)	p-value(Post * Non-Diabetic vs. Pre * Non-Diabetic)	Ratio(Post * Non-Diabetic vs. Pre * Non-Diabetic)	Fold-Change(Post * Non-Diabetic vs. Pre * Non-Diabetic)	Fold-Change(Post * Non-Diabetic vs. Pre * Non-Diabetic) (Description)	T(Post * Non-Diabetic vs. Pre * Non-Diabetic)	p-value(Post * Diabetic vs. Post * Non-Diabetic)	Ratio(Post * Diabetic vs. Post * Non-Diabetic)	Fold-Change(Post * Diabetic vs. Post * Non-Diabetic)	Fold-Change(Post * Diabetic vs. Post * Non-Diabetic) (Description)	T(Post * Diabetic vs. Post * Non-Diabetic)	F(Timepoint)	SS(Timepoint)	F(Diabetic/Non-Diabetic)	SS(Diabetic/Non-Diabetic)	F(Age)	SS(Age)	F(BMI)	SS(BMI)	F(Timepoint * Diabetic/Non-Diabetic)	SS(Timepoint * Diabetic/Non-Diabetic)	F(Error)
22759	237652_at	---	---	---	---	0.000402078	0.594573	0.118858	2.3121e-11	0.0347889	5.6781	0.203296	5.86704	0.197983	6.25889	0.251028	6.06426	0.23524	0.070757	1.16692	1.16692	Pre * Diabetic up vs Pre * Non-Diabetic	2.08325	0.000569697	0.668596	-1.49567	Post * Diabetic down vs Pre * Diabetic	-5.506	0.0366823	0.854144	-1.17076	Post * Non-Diabetic down vs Pre * Non-Diabetic	-2.50453	0.272407	0.913429	-1.09478	Post * Diabetic down vs Post * Non-Diabetic	-1.17864	33.7179	33.7179	0.302196	0.302196	3.05038	3.05038	2630.97	2630.97	6.44427	6.44427	1
22709	237388_at	---	---	---	---	0.0010077	0.0680615	0.912274	1.00356e-10	0.0397088	5.50899	0.188564	5.14372	0.156938	4.92948	0.220939	4.94187	0.219254	0.929733	0.992779	-1.00727	Pre * Diabetic down vs Pre * Non-Diabetic	-0.0909961	0.00113875	1.49435	1.49435	Post * Diabetic up vs Pre * Diabetic	4.93742	0.0830235	1.14851	1.14851	Post * Non-Diabetic up vs Pre * Non-Diabetic	1.9802	0.014605	1.29172	1.29172	Post * Diabetic up vs Post * Non-Diabetic	3.10274	25.3526	25.3526	4.18253	4.18253	0.0129285	0.0129285	1820.56	1820.56	6.02049	6.02049	1
25030	243826_at	---	---	---	---	0.00116218	0.0551018	0.171524	8.63561e-11	0.0149787	5.47231	0.144685	4.99467	0.162349	4.87263	0.331496	4.88492	0.251538	0.747757	0.973996	-1.0267	Pre * Diabetic down vs Pre * Non-Diabetic	-0.332912	0.000744228	1.51539	1.51539	Post * Diabetic up vs Pre * Diabetic	5.28219	0.197157	1.09995	1.09995	Post * Non-Diabetic up vs Pre * Non-Diabetic	1.40669	0.00714326	1.34186	1.34186	Post * Diabetic up vs Post * Non-Diabetic	3.58432	24.2187	24.2187	4.71208	4.71208	2.25568	2.25568	1890.52	1890.52	9.52377	9.52377	1
25264	244470_at	---	---	---	---	0.00119687	0.264407	0.834806	9.08311e-10	0.161777	4.36476	0.123119	4.11767	0.210681	3.80974	0.180663	3.83248	0.244874	0.833653	0.981754	-1.01858	Pre * Diabetic down vs Pre * Non-Diabetic	-0.216983	0.00283103	1.46919	1.46919	Post * Diabetic up vs Pre * Diabetic	4.24167	0.0327237	1.22205	1.22205	Post * Non-Diabetic up vs Pre * Non-Diabetic	2.57789	0.0955989	1.1803	1.1803	Post * Diabetic up vs Post * Non-Diabetic	1.88882	23.9899	23.9899	1.39802	1.39802	0.0464198	0.0464198	1046.57	1046.57	2.37607	2.37607	1
22033	235601_at	---	---	---	---	0.00236744	0.20828	0.00250689	8.36904e-12	0.90636	6.92077	0.325375	6.87219	0.165487	6.53682	0.445463	6.59092	0.18451	0.314492	0.913704	-1.09445	Pre * Diabetic down vs Pre * Non-Diabetic	-1.07318	0.0181125	1.30492	1.30492	Post * Diabetic up vs Pre * Diabetic	2.96122	0.0114211	1.28629	1.28629	Post * Non-Diabetic up vs Pre * Non-Diabetic	3.26619	0.408389	0.926934	-1.07883	Post * Diabetic down vs Post * Non-Diabetic	-0.87244	19.1327	19.1327	1.80948	1.80948	18.762	18.762	3394.03	3394.03	0.0147405	0.0147405	1
24014	241459_at	---	---	---	---	0.00349144	0.0442473	0.00312882	0.0202478	0.800289	7.69251	0.505989	7.56488	0.358325	7.21641	0.423563	7.41552	0.41123	0.0829291	0.782118	-1.27858	Pre * Diabetic down vs Pre * Non-Diabetic	-1.98093	0.00700683	1.71968	1.71968	Post * Diabetic up vs Pre * Diabetic	3.59759	0.0142693	1.64164	1.64164	Post * Non-Diabetic up vs Pre * Non-Diabetic	3.11811	0.187222	0.819299	-1.22056	Post * Diabetic down vs Post * Non-Diabetic	-1.44221	16.7182	16.7182	5.29043	5.29043	17.3758	17.3758	8.34304	8.34304	0.0683997	0.0683997	1
25093	243997_x_at	---	---	---	---	0.00430688	0.171077	0.759008	0.0358896	0.759072	4.24092	0.356129	3.44848	0.45204	3.67134	0.37089	3.06398	0.712481	0.157945	1.42589	1.42589	Pre * Diabetic up vs Pre * Non-Diabetic	1.55759	0.00448854	2.17636	2.17636	Post * Diabetic up vs Pre * Diabetic	3.90881	0.00971642	2.30756	2.30756	Post * Non-Diabetic up vs Pre * Non-Diabetic	3.37479	0.270294	1.34482	1.34482	Post * Diabetic up vs Post * Non-Diabetic	1.18427	15.5093	15.5093	2.17462	2.17462	0.100793	0.100793	6.34311	6.34311	0.100738	0.100738	1
24777	243095_at	---	---	---	---	0.0049286	0.524299	0.0863549	2.1084e-11	0.336396	5.67966	0.242698	5.7485	0.105671	5.97051	0.253416	5.88461	0.172123	0.281674	1.08376	1.08376	Pre * Diabetic up vs Pre * Non-Diabetic	1.15434	0.0123077	0.81742	-1.22336	Post * Diabetic down vs Pre * Diabetic	-3.21628	0.0632376	0.889718	-1.12395	Post * Non-Diabetic down vs Pre * Non-Diabetic	-2.15543	0.953916	0.995695	-1.00432	Post * Diabetic down vs Post * Non-Diabetic	-0.0596261	14.766	14.766	0.43531	0.43531	3.82108	3.82108	2692.51	2692.51	1.04583	1.04583	1
14601	221798_x_at	---	---	---	---	0.00517156	0.851793	0.612925	1.49526e-14	0.140981	11.9268	0.201863	11.8635	0.0559241	11.7123	0.209186	11.7851	0.0988745	0.386377	0.946343	-1.0567	Pre * Diabetic down vs Pre * Non-Diabetic	-0.91614	0.00678993	1.16032	1.16032	Post * Diabetic up vs Pre * Diabetic	3.61925	0.13764	1.06123	1.06123	Post * Non-Diabetic up vs Pre * Non-Diabetic	1.64957	0.599196	1.0347	1.0347	Post * Diabetic up vs Post * Non-Diabetic	0.54716	14.5068	14.5068	0.0367591	0.0367591	0.277039	0.277039	16536.2	16536.2	2.6687	2.6687	1
23332	239179_at	---	---	---	---	0.005899	0.0724091	0.27364	0.296783	0.568114	6.28667	0.335439	6.49144	0.335478	5.56071	0.564504	6.02523	0.406852	0.0603999	0.69123	-1.4467	Pre * Diabetic down vs Pre * Non-Diabetic	-2.18489	0.00380775	1.878	1.878	Post * Diabetic up vs Pre * Diabetic	4.02627	0.0225687	1.71502	1.71502	Post * Non-Diabetic up vs Pre * Non-Diabetic	2.81784	0.17543	0.75692	-1.32114	Post * Diabetic down vs Post * Non-Diabetic	-1.4866	13.8141	13.8141	4.03229	4.03229	1.3815	1.3815	1.24565	1.24565	0.354349	0.354349	1
23304	239109_at	---	---	---	---	0.00606881	0.256389	0.961138	0.0259108	0.964982	2.24765	0.981524	2.97991	0.662233	2.85584	0.379109	3.29707	0.507496	0.315579	0.781785	-1.27912	Pre * Diabetic down vs Pre * Non-Diabetic	-1.07061	0.00771973	0.432021	-2.3147	Post * Diabetic down vs Pre * Diabetic	-3.53109	0.0175265	0.436988	-2.28839	Post * Non-Diabetic down vs Pre * Non-Diabetic	-2.98276	0.347227	0.772898	-1.29383	Post * Diabetic down vs Post * Non-Diabetic	-0.998608	13.6678	13.6678	1.44913	1.44913	0.00252734	0.00252734	7.44403	7.44403	0.00205173	0.00205173	1
25299	244559_at	---	---	---	---	0.00640505	0.512758	0.546531	0.0609059	0.298357	4.22895	0.305336	3.78171	0.333257	3.49921	0.398199	3.52269	0.582113	0.844418	0.967877	-1.03319	Pre * Diabetic down vs Pre * Non-Diabetic	-0.202716	0.00515112	2.05792	2.05792	Post * Diabetic up vs Pre * Diabetic	3.81157	0.0476326	1.61316	1.61316	Post * Non-Diabetic up vs Pre * Non-Diabetic	2.33708	0.275819	1.23472	1.23472	Post * Diabetic up vs Post * Non-Diabetic	1.16962	13.3926	13.3926	0.460567	0.460567	0.396358	0.396358	4.75041	4.75041	1.23697	1.23697	1
11959	216715_at	---	---	---	---	0.00858584	0.122675	0.371161	6.06681e-12	0.241453	6.81618	0.224251	6.84559	0.13864	6.50956	0.242171	6.71951	0.123682	0.0639743	0.855549	-1.16884	Pre * Diabetic down vs Pre * Non-Diabetic	-2.148	0.014232	1.2368	1.2368	Post * Diabetic up vs Pre * Diabetic	3.11985	0.13175	1.10373	1.10373	Post * Non-Diabetic up vs Pre * Non-Diabetic	1.67858	0.591116	0.958702	-1.04308	Post * Diabetic down vs Post * Non-Diabetic	-0.559532	11.9617	11.9617	2.84292	2.84292	0.897603	0.897603	3678.88	3678.88	1.60038	1.60038	1
19863	229725_at	100505572 /// 23305	ACSL6 /// LOC100505572	acyl-CoA synthetase long-chain family member 6 /// uncharacterized LOC100505572	NM_001009185 /// NM_001205247 /// NM_001205248 /// NM_001205250 /// NM_001205251 /// NM	0.00505919	0.213665	0.12112	0.849718	0.521579	5.27588	0.445248	5.26476	0.396871	4.2733	0.411478	4.56444	0.372347	0.168132	0.781702	-1.27926	Pre * Diabetic down vs Pre * Non-Diabetic	-1.51542	0.00682602	2.04166	2.04166	Post * Diabetic up vs Pre * Diabetic	3.6156	0.0279851	1.7469	1.7469	Post * Non-Diabetic up vs Pre * Non-Diabetic	2.67864	0.631123	0.913602	-1.09457	Post * Diabetic down vs Post * Non-Diabetic	-0.499128	14.6248	14.6248	1.7638	1.7638	3.0072	3.0072	0.0383018	0.0383018	0.44922	0.44922	1
8991	211207_s_at	100505572 /// 23305	ACSL6 /// LOC100505572	acyl-CoA synthetase long-chain family member 6 /// uncharacterized LOC100505572	NM_001009185 /// NM_001205247 /// NM_001205248 /// NM_001205250 /// NM_001205251 /// NM	0.0074677	0.113672	0.0283267	0.866253	0.481517	4.87227	0.445943	4.88989	0.411046	3.71763	0.81216	4.12355	0.408842	0.0968774	0.70281	-1.42286	Pre * Diabetic down vs Pre * Non-Diabetic	-1.88019	0.00898298	2.18371	2.18371	Post * Diabetic up vs Pre * Diabetic	3.42787	0.0415359	1.79111	1.79111	Post * Non-Diabetic up vs Pre * Non-Diabetic	2.42483	0.480841	0.856863	-1.16705	Post * Diabetic down vs Post * Non-Diabetic	-0.73932	12.6296	12.6296	3.005	3.005	7.13322	7.13322	0.0302461	0.0302461	0.544855	0.544855	1
5433	203872_at	58	ACTA1	actin, alpha 1, skeletal muscle	NM_001100	0.00336617	0.456433	0.680874	7.71374e-18	0.0656748	13.2101	0.0636992	13.1423	0.0560923	13.1022	0.0745257	13.1106	0.047773	0.780815	0.992607	-1.00745	Pre * Diabetic down vs Pre * Non-Diabetic	-0.2878	0.00320085	1.07767	1.07767	Post * Diabetic up vs Pre * Diabetic	4.15185	0.170576	1.02405	1.02405	Post * Non-Diabetic up vs Pre * Non-Diabetic	1.50565	0.141174	1.04459	1.04459	Post * Diabetic up vs Post * Non-Diabetic	1.63271	16.9353	16.9353	0.600191	0.600191	0.182042	0.182042	109764	109764	4.54182	4.54182	1
14637	221850_x_at	119016 /// 119385 /// 399753 /// 399761 /// 414189 /// 653268 /// 728404	AGAP11 /// AGAP4 /// AGAP6 /// AGAP7 /// AGAP8 /// BMS1P5 /// LOC399753	ankyrin repeat and GTPase domain Arf GTPase activating protein 11 /// ArfGAP with GTPas	NM_001040053 /// NM_001077665 /// NM_001077685 /// NM_001077686 /// NM_133446 /// NM_13	0.00246623	0.765913	0.118202	3.47783e-12	0.202239	7.70988	0.242619	7.73301	0.18577	7.47495	0.142696	7.30885	0.239464	0.268322	1.09937	1.09937	Pre * Diabetic up vs Pre * Non-Diabetic	1.18957	0.0874168	1.17685	1.17685	Post * Diabetic up vs Pre * Diabetic	1.94685	0.00228413	1.37158	1.37158	Post * Non-Diabetic up vs Pre * Non-Diabetic	4.40086	0.498827	0.943288	-1.06012	Post * Diabetic down vs Post * Non-Diabetic	-0.708379	18.8673	18.8673	0.0936088	0.0936088	3.06309	3.06309	4229.01	4229.01	1.92966	1.92966	1
22233	236007_at	11216	AKAP10	A kinase (PRKA) anchor protein 10	NM_007202	0.00651978	0.707224	0.0408679	2.77178e-12	0.380984	7.09324	0.305899	6.98213	0.175209	6.77551	0.207663	6.83308	0.0787433	0.384015	0.936518	-1.06779	Pre * Diabetic down vs Pre * Non-Diabetic	-0.920935	0.0166681	1.24637	1.24637	Post * Diabetic up vs Pre * Diabetic	3.01571	0.070365	1.13993	1.13993	Post * Non-Diabetic up vs Pre * Non-Diabetic	2.08682	0.75634	1.02397	1.02397	Post * Diabetic up vs Post * Non-Diabetic	0.321131	13.3028	13.3028	0.149381	0.149381	5.93031	5.93031	4476.28	4476.28	0.859553	0.859553	1
5634	204151_x_at	1645	AKR1C1	aldo-keto reductase family 1, member C1 (dihydrodiol dehydrogenase 1; 20-alpha (3-alpha	NM_001353	0.00361038	0.49699	0.795171	0.0918345	0.090405	9.8697	0.483807	9.69912	0.34178	10.3498	0.660188	10.4202	0.500827	0.992149	0.997843	-1.00216	Pre * Diabetic down vs Pre * Non-Diabetic	-0.0101513	0.00909106	0.548793	-1.82218	Post * Diabetic down vs Pre * Diabetic	-3.41977	0.00367251	0.407394	-2.45463	Post * Non-Diabetic down vs Pre * Non-Diabetic	-4.05229	0.236868	1.34418	1.34418	Post * Diabetic up vs Post * Non-Diabetic	1.27864	16.5209	16.5209	0.496817	0.496817	0.0720474	0.0720474	3.66685	3.66685	3.70591	3.70591	1
11932	216594_x_at	1645	AKR1C1	aldo-keto reductase family 1, member C1 (dihydrodiol dehydrogenase 1; 20-alpha (3-alpha	NM_001353	0.00511398	0.6917	0.877898	0.106277	0.025905	9.56265	0.552162	9.38061	0.392725	9.9323	0.768704	10.1586	0.494473	0.635638	0.893099	-1.1197	Pre * Diabetic down vs Pre * Non-Diabetic	-0.492439	0.0191579	0.592108	-1.68888	Post * Diabetic down vs Pre * Diabetic	-2.92453	0.00349409	0.392553	-2.54743	Post * Non-Diabetic down vs Pre * Non-Diabetic	-4.08824	0.26286	1.34711	1.34711	Post * Diabetic up vs Post * Non-Diabetic	1.20439	14.5669	14.5669	0.166662	0.166662	0.025161	0.025161	3.31185	3.31185	7.44482	7.44482	1
8330	209699_x_at	100653286 /// 1646	AKR1C2 /// LOC100653286	aldo-keto reductase family 1, member C2 (dihydrodiol dehydrogenase 2; bile acid binding	NM_001135241 /// NM_001354 /// NM_205845 /// XM_003403856	0.00356233	0.522463	0.753739	0.115676	0.0609089	9.72093	0.513513	9.51465	0.400372	10.2429	0.698481	10.3414	0.542721	0.93357	0.980215	-1.02018	Pre * Diabetic down vs Pre * Non-Diabetic	-0.086013	0.00940717	0.53434	-1.87147	Post * Diabetic down vs Pre * Diabetic	-3.39663	0.00329563	0.379134	-2.63759	Post * Non-Diabetic down vs Pre * Non-Diabetic	-4.13062	0.234053	1.38149	1.38149	Post * Diabetic up vs Post * Non-Diabetic	1.28709	16.5996	16.5996	0.439258	0.439258	0.105427	0.105427	3.11297	3.11297	4.75027	4.75027	1
1575	1559640_at	162282	ANKFN1	Ankyrin-repeat and fibronectin type III domain containing 1	NM_153228	0.00398988	0.549439	0.320458	0.00795173	0.88129	3.04394	0.427406	3.21448	0.292697	3.34164	0.208076	3.35457	0.403198	0.700187	1.04673	1.04673	Pre * Diabetic up vs Pre * Non-Diabetic	0.399205	0.00986868	0.635697	-1.57308	Post * Diabetic down vs Pre * Diabetic	-3.3643	0.0111675	0.620608	-1.61132	Post * Non-Diabetic down vs Pre * Non-Diabetic	-3.28122	0.601026	1.07218	1.07218	Post * Diabetic up vs Post * Non-Diabetic	0.544371	15.9422	15.9422	0.383784	0.383784	1.12181	1.12181	12.326	12.326	0.0237702	0.0237702	1
15052	222550_at	55156	ARMC1	armadillo repeat containing 1	NM_018120	0.00800311	0.314299	0.0335997	1.55794e-12	0.0540285	8.75011	0.221107	8.61703	0.135838	8.38511	0.352311	8.58611	0.190817	0.0626826	0.843336	-1.18577	Pre * Diabetic down vs Pre * Non-Diabetic	-2.16109	0.00512532	1.28788	1.28788	Post * Diabetic up vs Pre * Diabetic	3.8151	0.368182	1.05642	1.05642	Post * Non-Diabetic up vs Pre * Non-Diabetic	0.953653	0.74359	1.02812	1.02812	Post * Diabetic up vs Post * Non-Diabetic	0.338651	12.2952	12.2952	1.12251	1.12251	6.55823	6.55823	5170.86	5170.86	5.09116	5.09116	1
7770	208972_s_at	516	ATP5G1	ATP synthase, H+ transporting, mitochondrial Fo complex, subunit C1 (subunit 9)	NM_001002027 /// NM_005175	0.00785874	0.0122838	0.976374	3.6643e-13	0.00127565	10.4096	0.245716	10.2711	0.14359	9.72032	0.265123	10.3811	0.160575	0.000480835	0.632298	-1.58153	Pre * Diabetic down vs Pre * Non-Diabetic	-5.65106	0.000566293	1.61248	1.61248	Post * Diabetic up vs Pre * Diabetic	5.51109	0.337341	0.926928	-1.07883	Post * Non-Diabetic down vs Pre * Non-Diabetic	-1.02054	0.289031	1.09994	1.09994	Post * Diabetic up vs Post * Non-Diabetic	1.13552	12.3825	12.3825	9.29315	9.29315	0.000933556	0.000933556	7428.24	7428.24	23.4997	23.4997	1
5943	204624_at	540	ATP7B	ATPase, Cu++ transporting, beta polypeptide	NM_000053 /// NM_001005918 /// NM_001243182	0.00247235	0.274955	0.241803	1.12376e-10	0.222215	5.33777	0.252561	5.28791	0.156528	4.87248	0.319273	5.06431	0.132256	0.113841	0.861923	-1.1602	Pre * Diabetic down vs Pre * Non-Diabetic	-1.77485	0.00575066	1.38059	1.38059	Post * Diabetic up vs Pre * Diabetic	3.73448	0.0492368	1.18746	1.18746	Post * Non-Diabetic up vs Pre * Non-Diabetic	2.31586	0.981215	1.00211	1.00211	Post * Diabetic up vs Post * Non-Diabetic	0.0242922	18.8513	18.8513	1.33396	1.33396	1.59778	1.59778	1769.59	1769.59	1.75186	1.75186	1
3350	201354_s_at	11176	BAZ2A	bromodomain adjacent to zinc finger domain, 2A	NM_013449	0.00601705	0.317933	0.0434034	8.53124e-13	0.308702	7.51267	0.282827	7.58385	0.161356	7.36022	0.184367	7.34083	0.0694461	0.88188	0.990241	-1.00986	Pre * Diabetic down vs Pre * Non-Diabetic	-0.153403	0.122431	1.11146	1.11146	Post * Diabetic up vs Pre * Diabetic	1.72704	0.0063314	1.21347	1.21347	Post * Non-Diabetic up vs Pre * Non-Diabetic	3.6676	0.179261	0.906989	-1.10255	Post * Diabetic down vs Post * Non-Diabetic	-1.4719	13.7118	13.7118	1.10489	1.10489	5.7439	5.7439	6012.18	6012.18	1.18156	1.18156	1
12777	218314_s_at	55216	C11orf57	chromosome 11 open reading frame 57	NM_001082969 /// NM_001082970 /// NM_018195	0.00494471	0.690438	0.0265473	7.60272e-12	0.143693	6.18751	0.241922	6.03018	0.10777	5.83507	0.308962	5.93108	0.227963	0.208498	0.909407	-1.09962	Pre * Diabetic down vs Pre * Non-Diabetic	-1.368	0.00694189	1.27672	1.27672	Post * Diabetic up vs Pre * Diabetic	3.604	0.127485	1.10438	1.10438	Post * Non-Diabetic up vs Pre * Non-Diabetic	1.70035	0.506569	1.05133	1.05133	Post * Diabetic up vs Post * Non-Diabetic	0.695281	14.7483	14.7483	0.168115	0.168115	7.3587	7.3587	3476.67	3476.67	2.62739	2.62739	1
4403	202562_s_at	11161	C14orf1	chromosome 14 open reading frame 1	NM_007176	0.00854451	0.0269772	0.0129991	1.68118e-11	0.0516135	6.74704	0.254739	6.68783	0.0938709	6.27714	0.482053	6.65555	0.139854	0.00788396	0.738293	-1.35448	Pre * Diabetic down vs Pre * Non-Diabetic	-3.51669	0.00530158	1.38501	1.38501	Post * Diabetic up vs Pre * Diabetic	3.79135	0.393605	1.06893	1.06893	Post * Non-Diabetic up vs Pre * Non-Diabetic	0.901596	0.633206	0.956608	-1.04536	Post * Diabetic down vs Post * Non-Diabetic	-0.496039	11.9844	11.9844	6.70505	6.70505	10.1119	10.1119	2849.74	2849.74	5.22423	5.22423	1
12583	218089_at	25980	C20orf4	chromosome 20 open reading frame 4	NM_015511	0.00177313	0.616162	0.0251035	1.65823e-12	0.485353	6.3469	0.224995	6.28305	0.137132	6.12203	0.1883	6.01063	0.121553	0.400155	1.0544	1.0544	Pre * Diabetic up vs Pre * Non-Diabetic	0.888583	0.0344316	1.16867	1.16867	Post * Diabetic up vs Pre * Diabetic	2.54519	0.00351243	1.23978	1.23978	Post * Non-Diabetic up vs Pre * Non-Diabetic	4.08445	0.923804	0.993925	-1.00611	Post * Diabetic down vs Post * Non-Diabetic	-0.0987007	21.0896	21.0896	0.26765	0.26765	7.55618	7.55618	5090.72	5090.72	0.535074	0.535074	1
5662	204193_at	1120	CHKB	choline kinase beta	NM_005198 /// NM_152253	6.96101e-05	0.811941	0.00426438	4.65459e-12	0.410497	7.18147	0.318091	7.08365	0.333465	6.73787	0.370258	6.59361	0.245621	0.482513	1.0566	1.0566	Pre * Diabetic up vs Pre * Non-Diabetic	0.736413	0.00235974	1.36	1.36	Post * Diabetic up vs Pre * Diabetic	4.37653	0.00020905	1.47413	1.47413	Post * Non-Diabetic up vs Pre * Non-Diabetic	6.40037	0.750529	0.974791	-1.02586	Post * Diabetic down vs Post * Non-Diabetic	-0.329103	56.1742	56.1742	0.0596802	0.0596802	15.565	15.565	3931.33	3931.33	0.754022	0.754022	1
1199	1557798_at	10330	CNPY2	Canopy 2 homolog (zebrafish)	NM_001190991 /// NM_014255	0.00621059	0.175302	0.0840115	0.252631	0.00510426	5.31647	0.195861	5.18752	0.383594	5.15341	0.47035	4.43788	0.246065	0.0124501	1.5517	1.5517	Pre * Diabetic up vs Pre * Non-Diabetic	3.20862	0.122183	1.25454	1.25454	Post * Diabetic up vs Pre * Diabetic	1.72838	0.00175947	2.07229	2.07229	Post * Non-Diabetic up vs Pre * Non-Diabetic	4.59825	0.692493	0.939381	-1.06453	Post * Diabetic down vs Post * Non-Diabetic	-0.410103	13.5494	13.5494	2.12811	2.12811	3.89096	3.89096	1.5199	1.5199	14.5771	14.5771	1
8394	209797_at	10330	CNPY2	canopy 2 homolog (zebrafish)	NM_001190991 /// NM_014255	0.00896389	0.179643	0.995677	3.76316e-12	0.0272227	7.17173	0.242804	6.90951	0.12718	6.86816	0.111445	6.8731	0.148094	0.962579	0.996644	-1.00337	Pre * Diabetic down vs Pre * Non-Diabetic	-0.0484068	0.00360306	1.23419	1.23419	Post * Diabetic up vs Pre * Diabetic	4.06606	0.592676	1.02549	1.02549	Post * Non-Diabetic up vs Pre * Non-Diabetic	0.557135	0.0355585	1.19947	1.19947	Post * Diabetic up vs Post * Non-Diabetic	2.5245	11.7602	11.7602	2.08184	2.08184	3.12456e-05	3.12456e-05	4146.32	4146.32	7.27091	7.27091	1
6812	206441_s_at	54939	COMMD4	COMM domain containing 4	NM_017828	0.00405942	0.0528426	0.0259773	3.71909e-11	0.497257	6.14405	0.292792	6.18142	0.207969	5.72061	0.43839	5.94085	0.232848	0.0675951	0.828823	-1.20653	Pre * Diabetic down vs Pre * Non-Diabetic	-2.11264	0.0148831	1.34113	1.34113	Post * Diabetic up vs Pre * Diabetic	3.09029	0.0363166	1.22696	1.22696	Post * Non-Diabetic up vs Pre * Non-Diabetic	2.51096	0.313812	0.905944	-1.10382	Post * Diabetic down vs Post * Non-Diabetic	-1.07479	15.8436	15.8436	4.82019	4.82019	7.43499	7.43499	2335.39	2335.39	0.505593	0.505593	1
7910	209132_s_at	54939	COMMD4	COMM domain containing 4	NM_017828	0.00537519	0.0571432	0.474833	8.51972e-13	0.503254	6.74917	0.137716	6.84312	0.0816367	6.54264	0.184719	6.71116	0.134556	0.057791	0.884063	-1.13114	Pre * Diabetic down vs Pre * Non-Diabetic	-2.21321	0.0179914	1.15391	1.15391	Post * Diabetic up vs Pre * Diabetic	2.96561	0.046514	1.10339	1.10339	Post * Non-Diabetic up vs Pre * Non-Diabetic	2.3523	0.211822	0.924537	-1.08162	Post * Diabetic down vs Post * Non-Diabetic	-1.35701	14.3012	14.3012	4.61899	4.61899	0.562231	0.562231	6014.21	6014.21	0.491225	0.491225	1
12814	218358_at	79174	CRELD2	cysteine-rich with EGF-like domains 2	NM_001135101 /// NM_024324	0.000670855	0.687112	0.517606	9.4422e-12	0.431691	6.6228	0.193102	6.5173	0.109237	6.28035	0.237134	6.27796	0.183737	0.937547	0.994205	-1.00583	Pre * Diabetic down vs Pre * Non-Diabetic	-0.0808509	0.00340868	1.26791	1.26791	Post * Diabetic up vs Pre * Diabetic	4.10615	0.00857651	1.18998	1.18998	Post * Non-Diabetic up vs Pre * Non-Diabetic	3.45931	0.4623	1.05932	1.05932	Post * Diabetic up vs Post * Non-Diabetic	0.772015	28.8201	28.8201	0.171983	0.171983	0.458089	0.458089	3292.97	3292.97	0.685536	0.685536	1
25494	36084_at	9820	CUL7	cullin 7	NM_001168370 /// NM_014780	0.00592271	0.954079	0.184258	3.49819e-12	0.0274373	6.02073	0.165036	6.14833	0.121049	6.2227	0.237508	6.16132	0.0661121	0.445724	1.05647	1.05647	Pre * Diabetic up vs Pre * Non-Diabetic	0.801993	0.00265491	0.869361	-1.15027	Post * Diabetic down vs Pre * Diabetic	-4.28901	0.464178	0.977899	-1.0226	Post * Non-Diabetic down vs Pre * Non-Diabetic	-0.768664	0.397995	0.939215	-1.06472	Post * Diabetic down vs Post * Non-Diabetic	-0.892858	13.7934	13.7934	0.00348641	0.00348641	2.1116	2.1116	4222.83	4222.83	7.24361	7.24361	1
20562	231790_at	29958	DMGDH	dimethylglycine dehydrogenase	NM_013391	0.00548212	0.194728	0.0574749	0.0261727	0.129855	3.42439	1.16175	3.80538	0.275623	3.67988	0.752756	4.25916	0.257641	0.0864063	0.666793	-1.49972	Pre * Diabetic down vs Pre * Non-Diabetic	-1.95437	0.0116318	0.580278	-1.72331	Post * Diabetic down vs Pre * Diabetic	-3.25397	0.00591194	0.454553	-2.19997	Post * Non-Diabetic down vs Pre * Non-Diabetic	-3.71521	0.493814	0.851221	-1.17478	Post * Diabetic down vs Post * Non-Diabetic	-0.71693	14.197	14.197	1.93176	1.93176	4.91387	4.91387	7.4086	7.4086	2.84993	2.84993	1
4848	203113_s_at	1936	EEF1D	eukaryotic translation elongation factor 1 delta (guanine nucleotide exchange protein)	NM_001130053 /// NM_001130054 /// NM_001130055 /// NM_001130056 /// NM_001130057 /// NM	0.00804109	0.281658	0.279558	1.76647e-13	0.0177609	11.2714	0.263762	11.1744	0.107374	10.9073	0.310754	11.1657	0.0514755	0.0357784	0.824806	-1.21241	Pre * Diabetic down vs Pre * Non-Diabetic	-2.52054	0.00262828	1.28708	1.28708	Post * Diabetic up vs Pre * Diabetic	4.29647	0.697757	1.02083	1.02083	Post * Non-Diabetic up vs Pre * Non-Diabetic	0.402642	0.634819	1.03993	1.03993	Post * Diabetic up vs Post * Non-Diabetic	0.493651	12.2725	12.2725	1.29501	1.29501	1.34522	1.34522	8916.15	8916.15	8.84498	8.84498	1
13954	220127_s_at	54850	FBXL12	F-box and leucine-rich repeat protein 12	NM_017703	0.00970638	0.771326	0.906717	2.63404e-12	0.213481	7.62334	0.124832	7.50062	0.170416	7.26333	0.238448	7.34444	0.180848	0.484935	0.946574	-1.05644	Pre * Diabetic down vs Pre * Non-Diabetic	-0.732212	0.0143638	1.28344	1.28344	Post * Diabetic up vs Pre * Diabetic	3.11375	0.158693	1.11276	1.11276	Post * Non-Diabetic up vs Pre * Non-Diabetic	1.55442	0.290378	1.09176	1.09176	Post * Diabetic up vs Post * Non-Diabetic	1.13211	11.3939	11.3939	0.0891881	0.0891881	0.0146278	0.0146278	4533.77	4533.77	1.82678	1.82678	1
15278	222861_x_at	93611	FBXO44	F-box protein 44	NM_001014765 /// NM_033182 /// NM_183412 /// NM_183413	0.0011407	0.999215	0.504429	3.1741e-11	0.790236	4.62081	0.13036	4.62432	0.13771	4.8973	0.276958	4.92313	0.178441	0.862982	0.988803	-1.01132	Pre * Diabetic down vs Pre * Non-Diabetic	-0.178217	0.0152265	0.825597	-1.21124	Post * Diabetic down vs Pre * Diabetic	-3.07524	0.00398589	0.807132	-1.23896	Post * Non-Diabetic down vs Pre * Non-Diabetic	-3.99348	0.86663	1.01142	1.01142	Post * Diabetic up vs Post * Non-Diabetic	0.173418	24.3647	24.3647	1.01762e-06	1.01762e-06	0.488445	0.488445	2430.05	2430.05	0.0756616	0.0756616	1
19767	229519_at	8087	FXR1	fragile X mental retardation, autosomal homolog 1	NM_001013438 /// NM_001013439 /// NM_005087	0.0048133	0.875344	0.0263417	3.28429e-11	0.680222	6.06453	0.182598	5.91298	0.198487	5.69464	0.390236	5.66882	0.194143	0.859466	0.984587	-1.01565	Pre * Diabetic down vs Pre * Non-Diabetic	-0.182848	0.0223612	1.29225	1.29225	Post * Diabetic up vs Pre * Diabetic	2.82384	0.0299125	1.22782	1.22782	Post * Non-Diabetic up vs Pre * Non-Diabetic	2.6357	0.695844	1.03625	1.03625	Post * Diabetic up vs Post * Non-Diabetic	0.40535	14.8946	14.8946	0.0259022	0.0259022	7.38597	7.38597	2409.34	2409.34	0.182838	0.182838	1
12272	217751_at	373156	GSTK1	glutathione S-transferase kappa 1	NM_001143679 /// NM_001143680 /// NM_001143681 /// NM_015917	0.0044241	0.486676	0.721394	2.54634e-13	0.00408569	9.19967	0.203217	8.96589	0.118367	8.65366	0.22509	8.97547	0.124452	0.0103962	0.797154	-1.25446	Pre * Diabetic down vs Pre * Non-Diabetic	-3.32923	0.000821999	1.46005	1.46005	Post * Diabetic up vs Pre * Diabetic	5.2004	0.966329	0.997285	-1.00272	Post * Non-Diabetic down vs Pre * Non-Diabetic	-0.0435524	0.059582	1.16705	1.16705	Post * Diabetic up vs Post * Non-Diabetic	2.19364	15.3592	15.3592	0.521672	0.521672	0.136479	0.136479	8136.57	8136.57	15.8069	15.8069	1
16316	224734_at	3146	HMGB1	high mobility group box 1	NM_002128	0.0012188	0.053463	0.0080179	4.38102e-13	0.0237486	8.02526	0.309305	7.89176	0.0915665	7.51324	0.288602	7.80346	0.121126	0.0073208	0.790938	-1.26432	Pre * Diabetic down vs Pre * Non-Diabetic	-3.56745	0.000987771	1.42605	1.42605	Post * Diabetic up vs Pre * Diabetic	5.05121	0.145638	1.10201	1.10201	Post * Non-Diabetic up vs Pre * Non-Diabetic	1.61195	0.741328	1.02351	1.02351	Post * Diabetic up vs Post * Non-Diabetic	0.341771	23.8495	23.8495	4.78994	4.78994	12.2863	12.2863	7103.47	7103.47	7.75502	7.75502	1
11092	214457_at	3199	HOXA2	homeobox A2	NM_006735	0.00470446	0.177677	0.0591455	2.50771e-09	0.095952	3.81442	0.329799	3.92238	0.158626	4.30958	0.329319	4.04886	0.133209	0.0445779	1.23285	1.23285	Pre * Diabetic up vs Pre * Non-Diabetic	2.37954	0.00524814	0.709481	-1.40948	Post * Diabetic down vs Pre * Diabetic	-3.79846	0.165516	0.888266	-1.12579	Post * Non-Diabetic down vs Pre * Non-Diabetic	-1.52603	0.869893	0.98471	-1.01553	Post * Diabetic down vs Post * Non-Diabetic	-0.169129	15.0197	15.0197	2.10261	2.10261	4.83276	4.83276	810.298	810.298	3.55861	3.55861	1
19820	229632_s_at	55174	INTS10	integrator complex subunit 10	NM_018142	0.00581675	0.274977	0.0270528	5.92925e-12	0.460823	7.04339	0.36421	6.99558	0.161385	6.72251	0.198701	6.83398	0.145268	0.195943	0.897	-1.11483	Pre * Diabetic down vs Pre * Non-Diabetic	-1.41095	0.017852	1.24909	1.24909	Post * Diabetic up vs Pre * Diabetic	2.9707	0.0536239	1.15703	1.15703	Post * Non-Diabetic up vs Pre * Non-Diabetic	2.26118	0.697991	0.968366	-1.03267	Post * Diabetic down vs Post * Non-Diabetic	-0.402311	13.8869	13.8869	1.33383	1.33383	7.29274	7.29274	3700.07	3700.07	0.600092	0.600092	1
2745	200700_s_at	11014	KDELR2	KDEL (Lys-Asp-Glu-Leu) endoplasmic reticulum protein retention receptor 2	NM_001100603 /// NM_006854	0.00194433	0.00638639	0.112466	3.66873e-13	0.00239091	8.00752	0.127194	7.95315	0.141742	7.50952	0.269129	7.96994	0.0886443	0.000563989	0.714945	-1.39871	Pre * Diabetic down vs Pre * Non-Diabetic	-5.51455	0.000375409	1.41225	1.41225	Post * Diabetic up vs Pre * Diabetic	5.86717	0.908175	1.00605	1.00605	Post * Non-Diabetic up vs Pre * Non-Diabetic	0.119045	0.955896	1.00361	1.00361	Post * Diabetic up vs Post * Non-Diabetic	0.0570604	20.45	20.45	11.7982	11.7982	3.17844	3.17844	7426	7426	19.0684	19.0684	1
2619	200076_s_at	79036	KXD1	KxDL motif containing 1	NM_001171948 /// NM_001171949 /// NM_024069	0.00744591	0.190241	0.307147	4.06664e-14	0.337912	7.66385	0.103616	7.59222	0.111261	7.58969	0.136593	7.46949	0.119316	0.1188	1.07919	1.07919	Pre * Diabetic up vs Pre * Non-Diabetic	1.74685	0.130283	1.05275	1.05275	Post * Diabetic up vs Pre * Diabetic	1.686	0.00841982	1.09715	1.09715	Post * Non-Diabetic up vs Pre * Non-Diabetic	3.47185	0.462331	1.03552	1.03552	Post * Diabetic up vs Post * Non-Diabetic	0.771958	12.6439	12.6439	1.97476	1.97476	1.18971	1.18971	12875.2	12875.2	1.03888	1.03888	1
1606	1559901_s_at	388815	LINC00478	long intergenic non-protein coding RNA 478	NM_001005732 /// NM_001005733 /// NM_001005734 /// NR_027790 /// NR_027791	0.00806857	0.0517056	0.972768	2.48376e-11	0.07915	5.63878	0.188843	5.33049	0.150101	5.72385	0.159501	5.64582	0.159251	0.469907	1.05517	1.05517	Pre * Diabetic up vs Pre * Non-Diabetic	0.758498	0.352908	0.942739	-1.06074	Post * Diabetic down vs Pre * Diabetic	-0.986224	0.00297468	0.804001	-1.24378	Post * Non-Diabetic down vs Pre * Non-Diabetic	-4.20535	0.0200343	1.23725	1.23725	Post * Diabetic up vs Post * Non-Diabetic	2.89534	12.2562	12.2562	4.87678	4.87678	0.0012404	0.0012404	2584.16	2584.16	4.0443	4.0443	1
10801	213893_x_at	100132832 /// 5380 /// 5383	LOC100132832 /// PMS2L2 /// PMS2P5	PMS2 postmeiotic segregation increased 2 (S. cerevisiae) pseudogene /// postmeiotic seg	NM_001129851 /// NM_174930 /// NR_003614 /// NR_027775 /// NR_027776 /// NR_027777 ///	0.000248759	0.687598	0.105469	1.5097e-12	0.0438639	7.32355	0.176462	7.19595	0.159132	6.93103	0.229504	7.04869	0.127001	0.164475	0.905324	-1.10458	Pre * Diabetic down vs Pre * Non-Diabetic	-1.53029	0.000439104	1.31268	1.31268	Post * Diabetic up vs Pre * Diabetic	5.72971	0.0191649	1.12903	1.12903	Post * Non-Diabetic up vs Pre * Non-Diabetic	2.92429	0.468855	1.05259	1.05259	Post * Diabetic up vs Post * Non-Diabetic	0.760358	38.9204	38.9204	0.171414	0.171414	3.33	3.33	5211.73	5211.73	5.71154	5.71154	1
24408	242358_at	100506451	LOC100506451	uncharacterized LOC100506451	NR_038227 /// NR_038228	0.00560196	0.14625	0.0208237	5.01105e-12	0.238311	6.9815	0.232352	6.91361	0.221714	6.58341	0.31479	6.76769	0.161662	0.0740639	0.852026	-1.17367	Pre * Diabetic down vs Pre * Non-Diabetic	-2.05385	0.0106761	1.31776	1.31776	Post * Diabetic up vs Pre * Diabetic	3.31139	0.0934615	1.14573	1.14573	Post * Non-Diabetic up vs Pre * Non-Diabetic	1.90351	0.808111	0.979961	-1.02045	Post * Diabetic down vs Post * Non-Diabetic	-0.251039	14.0833	14.0833	2.48177	2.48177	8.23783	8.23783	3859.34	3859.34	1.62395	1.62395	1
5720	204275_at	100507047 /// 6650	LOC100507047 /// SOLH	uncharacterized LOC100507047 /// small optic lobes homolog (Drosophila)	NM_005632 /// XR_109234 /// XR_133112	0.0085586	0.470643	0.478399	0.0570319	0.0519984	4.94949	0.541414	4.56379	0.458313	4.68457	0.730577	4.12396	0.716412	0.274083	1.4286	1.4286	Pre * Diabetic up vs Pre * Non-Diabetic	1.1742	0.0146215	1.68602	1.68602	Post * Diabetic up vs Pre * Diabetic	3.102	0.00773732	2.18181	2.18181	Post * Non-Diabetic up vs Pre * Non-Diabetic	3.52953	0.760956	1.10397	1.10397	Post * Diabetic up vs Post * Non-Diabetic	0.314815	11.9766	11.9766	0.562211	0.562211	0.552908	0.552908	4.93589	4.93589	5.20249	5.20249	1
19254	228571_at	100533952 /// 389458 /// 57786	LOC389458 /// RBAK /// RBAK-LOC389458	uncharacterized LOC389458 /// RB-associated KRAB zinc finger /// RBAK-LOC389458 readthr	NM_001204456 /// NM_001204513 /// NM_021163 /// NM_203393 /// NR_015343	0.00878584	0.579789	0.577465	5.85488e-12	0.0795419	7.26837	0.173615	7.16249	0.14607	6.89777	0.186051	7.07538	0.215479	0.126191	0.878237	-1.13864	Pre * Diabetic down vs Pre * Non-Diabetic	-1.70709	0.00698132	1.29289	1.29289	Post * Diabetic up vs Pre * Diabetic	3.6001	0.304069	1.06997	1.06997	Post * Non-Diabetic up vs Pre * Non-Diabetic	1.09819	0.473198	1.06121	1.06121	Post * Diabetic up vs Post * Non-Diabetic	0.752695	11.8537	11.8537	0.32747	0.32747	0.33715	0.33715	3711.79	3711.79	4.03149	4.03149	1
2631	200088_x_at	6136 /// 648771 /// 65065	LOC648771 /// NBEAL1 /// RPL12	60S ribosomal protein L12-like /// neurobeachin-like 1 /// ribosomal protein L12	NM_000976 /// NM_001099273 /// NM_001114132 /// NM_198945 /// NM_205543 /// XR_133285	0.00287483	0.48384	0.125424	4.61868e-14	0.333858	12.114	0.172622	12.0702	0.0746701	11.8413	0.31788	11.9324	0.159288	0.275553	0.921853	-1.08477	Pre * Diabetic down vs Pre * Non-Diabetic	-1.17032	0.00823289	1.2081	1.2081	Post * Diabetic up vs Pre * Diabetic	3.48714	0.0407288	1.122	1.122	Post * Non-Diabetic up vs Pre * Non-Diabetic	2.43741	0.920533	0.992597	-1.00746	Post * Diabetic down vs Post * Non-Diabetic	-0.102955	17.8962	17.8962	0.52867	0.52867	2.92791	2.92791	12471.7	12471.7	1.05756	1.05756	1
9772	212505_s_at	23383	MAU2	MAU2 chromatid cohesion factor homolog (C. elegans)	NM_015329	0.00127256	0.742394	0.284017	3.90455e-12	0.32449	7.49673	0.225272	7.51318	0.265638	7.19442	0.180492	7.06407	0.159711	0.352469	1.0804	1.0804	Pre * Diabetic up vs Pre * Non-Diabetic	0.987176	0.0367736	1.23311	1.23311	Post * Diabetic up vs Pre * Diabetic	2.50293	0.00192214	1.38448	1.38448	Post * Non-Diabetic up vs Pre * Non-Diabetic	4.53088	0.647699	0.962276	-1.0392	Post * Diabetic down vs Post * Non-Diabetic	-0.474686	23.5183	23.5183	0.114205	0.114205	1.31861	1.31861	4108.2	4108.2	1.10206	1.10206	1
1611	1559942_at	29969	MDFIC	MyoD family inhibitor domain containing	NM_001166345 /// NM_001166346 /// NM_199072	0.00595348	0.948781	0.229245	4.93763e-11	0.939026	5.0447	0.320976	5.07562	0.132211	5.31958	0.170892	5.34063	0.143114	0.99443	0.999463	-1.00054	Pre * Diabetic down vs Pre * Non-Diabetic	-0.0072018	0.0437172	0.826517	-1.2099	Post * Diabetic down vs Pre * Diabetic	-2.39203	0.019581	0.819699	-1.21996	Post * Non-Diabetic down vs Pre * Non-Diabetic	-2.91027	0.922422	1.00778	1.00778	Post * Diabetic up vs Post * Non-Diabetic	0.100498	13.7666	13.7666	0.00433854	0.00433854	1.69446	1.69446	2175.15	2175.15	0.00623003	0.00623003	1
25654	48659_at	60672	MIIP	migration and invasion inhibitory protein	NM_001025374 /// NM_021933	0.00631459	0.777162	0.281512	3.74643e-12	0.094982	7.3942	0.151852	7.31007	0.193193	7.1162	0.198605	7.20197	0.130135	0.528175	0.954074	-1.04814	Pre * Diabetic down vs Pre * Non-Diabetic	-0.659375	0.00609847	1.21251	1.21251	Post * Diabetic up vs Pre * Diabetic	3.6936	0.214034	1.06347	1.06347	Post * Non-Diabetic up vs Pre * Non-Diabetic	1.34978	0.2881	1.08778	1.08778	Post * Diabetic up vs Post * Non-Diabetic	1.13788	13.4648	13.4648	0.0845521	0.0845521	1.33348	1.33348	4150.95	4150.95	3.58356	3.58356	1
18362	227186_s_at	64975	MRPL41	mitochondrial ribosomal protein L41	NM_032477	0.00549507	0.0941658	0.228921	4.27975e-13	0.000124431	10.0546	0.216006	9.9306	0.239653	9.51397	0.174897	10.0667	0.126588	0.00120412	0.691806	-1.44549	Pre * Diabetic down vs Pre * Non-Diabetic	-4.89317	0.000103062	1.45457	1.45457	Post * Diabetic up vs Pre * Diabetic	7.08945	0.0446176	0.895737	-1.1164	Post * Non-Diabetic down vs Pre * Non-Diabetic	-2.37897	0.174245	1.12341	1.12341	Post * Diabetic up vs Post * Non-Diabetic	1.49121	14.1846	14.1846	3.41961	3.41961	1.69705	1.69705	7145.17	7145.17	47.6207	47.6207	1
12040	217117_x_at	4584	MUC3A	mucin 3A, cell surface associated	XM_001725354 /// XM_003403552 /// XM_003403800 /// XM_003403832	0.00386739	0.570316	0.0490196	3.98718e-11	0.658276	5.49755	0.0682834	5.4912	0.181027	5.77726	0.317294	5.80275	0.18609	0.916965	1.00837	1.00837	Pre * Diabetic up vs Pre * Non-Diabetic	0.107596	0.0472479	0.823758	-1.21395	Post * Diabetic down vs Pre * Diabetic	-2.34227	0.00887013	0.78352	-1.27629	Post * Non-Diabetic down vs Pre * Non-Diabetic	-3.43645	0.48662	1.06015	1.06015	Post * Diabetic up vs Post * Non-Diabetic	0.729298	16.1212	16.1212	0.344392	0.344392	5.37632	5.37632	2294.98	2294.98	0.210911	0.210911	1
2896	200856_x_at	9611	NCOR1	nuclear receptor corepressor 1	NM_001190438 /// NM_001190440 /// NM_006311	0.00512996	0.144584	0.0288351	5.61034e-13	0.148869	6.73481	0.212621	6.84251	0.135625	6.63988	0.205286	6.64499	0.147592	0.647619	0.974796	-1.02586	Pre * Diabetic down vs Pre * Non-Diabetic	-0.474803	0.180262	1.06801	1.06801	Post * Diabetic up vs Pre * Diabetic	1.4681	0.00331036	1.17421	1.17421	Post * Non-Diabetic up vs Pre * Non-Diabetic	4.12738	0.0632642	0.886631	-1.12787	Post * Diabetic down vs Post * Non-Diabetic	-2.15516	14.5501	14.5501	2.50477	2.50477	7.07208	7.07208	6677.12	6677.12	2.55133	2.55133	1
16068	224373_s_at	4538	ND4	NADH dehydrogenase, subunit 4 (complex I)	---	0.00591552	0.797709	0.623544	2.48273e-17	0.0147198	13.2002	0.0801491	13.2646	0.0588434	13.3337	0.100009	13.2803	0.0474179	0.285591	1.0354	1.0354	Pre * Diabetic up vs Pre * Non-Diabetic	1.14427	0.00191993	0.911567	-1.09701	Post * Diabetic down vs Pre * Diabetic	-4.53175	0.652353	0.991646	-1.00842	Post * Non-Diabetic down vs Pre * Non-Diabetic	-0.467878	0.15503	0.951783	-1.05066	Post * Diabetic down vs Post * Non-Diabetic	-1.57011	13.7996	13.7996	0.0692958	0.0692958	0.260522	0.260522	81947.2	81947.2	9.59495	9.59495	1
13663	219542_at	79858	NEK11	NIMA (never in mitosis gene a)- related kinase 11	NM_001146003 /// NM_024800 /// NM_145910	0.00861919	0.549451	0.882162	1.43137e-10	0.559335	5.08868	0.0556924	5.09121	0.0791964	5.4509	0.217095	5.34185	0.353761	0.402642	1.08061	1.08061	Pre * Diabetic up vs Pre * Non-Diabetic	0.883683	0.0280265	0.777969	-1.2854	Post * Diabetic down vs Pre * Diabetic	-2.67768	0.0602553	0.838764	-1.19223	Post * Non-Diabetic down vs Pre * Non-Diabetic	-2.18643	0.980524	1.00229	1.00229	Post * Diabetic up vs Post * Non-Diabetic	0.0251854	11.9435	11.9435	0.38376	0.38376	0.0234189	0.0234189	1665.3	1665.3	0.37104	0.37104	1
20114	230283_at	140825	NEURL2	neuralized homolog 2 (Drosophila)	NM_080749	0.00395382	0.417011	0.759653	5.68263e-12	0.030911	6.98299	0.202935	6.83934	0.202083	6.47406	0.208607	6.73818	0.205509	0.0391815	0.829815	-1.20509	Pre * Diabetic down vs Pre * Non-Diabetic	-2.46224	0.00242381	1.423	1.423	Post * Diabetic up vs Pre * Diabetic	4.35656	0.318599	1.07665	1.07665	Post * Non-Diabetic up vs Pre * Non-Diabetic	1.0635	0.272381	1.09675	1.09675	Post * Diabetic up vs Post * Non-Diabetic	1.17871	15.9941	15.9941	0.716752	0.716752	0.100234	0.100234	3739.66	3739.66	6.83588	6.83588	1
10677	213684_s_at	10611	PDLIM5	PDZ and LIM domain 5	NM_001011513 /// NM_001011515 /// NM_001011516 /// NM_001256425 /// NM_001256426 /// NM	0.0096114	0.0787068	0.124912	2.78885e-14	0.0865553	12.2887	0.127507	12.309	0.101013	12.0301	0.268982	12.2668	0.179705	0.0263426	0.834035	-1.19899	Pre * Diabetic down vs Pre * Non-Diabetic	-2.71769	0.0076189	1.19632	1.19632	Post * Diabetic up vs Pre * Diabetic	3.54009	0.308782	1.04918	1.04918	Post * Non-Diabetic up vs Pre * Non-Diabetic	1.0868	0.489114	0.951005	-1.05152	Post * Diabetic down vs Post * Non-Diabetic	-0.724997	11.4387	11.4387	3.83347	3.83347	2.93715	2.93715	14149.1	14149.1	3.81522	3.81522	1
18298	227090_at	51317	PHF21A	PHD finger protein 21A	NM_001101802 /// NM_016621	0.00259124	0.0419509	0.568182	4.75519e-12	0.786417	6.1324	0.0889161	5.95123	0.170234	6.30513	0.179924	6.09429	0.172401	0.0509784	1.16377	1.16377	Pre * Diabetic up vs Pre * Non-Diabetic	2.29359	0.0155953	0.88716	-1.12719	Post * Diabetic down vs Pre * Diabetic	-3.05946	0.016009	0.900233	-1.11082	Post * Non-Diabetic down vs Pre * Non-Diabetic	-3.04223	0.0795189	1.14687	1.14687	Post * Diabetic up vs Post * Non-Diabetic	2.00804	18.55	18.55	5.43536	5.43536	0.354221	0.354221	3910.33	3910.33	0.0785246	0.0785246	1
10245	213074_at	55023	PHIP	pleckstrin homology domain interacting protein	NM_017934	0.00355192	0.80409	0.0137009	1.57949e-12	0.366381	8.32455	0.263609	8.15945	0.175422	7.91621	0.454381	7.96295	0.123185	0.414263	0.933537	-1.07119	Pre * Diabetic down vs Pre * Non-Diabetic	-0.861066	0.0106061	1.32716	1.32716	Post * Diabetic up vs Pre * Diabetic	3.31581	0.0434853	1.19169	1.19169	Post * Non-Diabetic up vs Pre * Non-Diabetic	2.39544	0.650287	1.03966	1.03966	Post * Diabetic up vs Post * Non-Diabetic	0.470897	16.6168	16.6168	0.0648899	0.0648899	9.8912	9.8912	5153.1	5153.1	0.91669	0.91669	1
15469	223148_at	94005	PIGS	phosphatidylinositol glycan anchor biosynthesis, class S	NM_033198	0.00445422	0.259286	0.00835116	3.13758e-13	0.0671701	7.69992	0.252994	7.6383	0.0718283	7.49328	0.292674	7.62282	0.140267	0.0883012	0.887386	-1.12691	Pre * Diabetic down vs Pre * Non-Diabetic	-1.94033	0.00381848	1.154	1.154	Post * Diabetic up vs Pre * Diabetic	4.02425	0.211744	1.04362	1.04362	Post * Non-Diabetic up vs Pre * Non-Diabetic	1.35727	0.773211	0.981246	-1.01911	Post * Diabetic down vs Post * Non-Diabetic	-0.298115	15.3215	15.3215	1.43041	1.43041	12.0925	12.0925	7722.38	7722.38	4.48038	4.48038	1
12144	217485_x_at	5379	PMS2P1	postmeiotic segregation increased 2 pseudogene 1	NM_005394 /// NR_003613	0.000369673	0.36288	0.282897	9.14367e-13	0.0441322	7.82868	0.125361	7.76357	0.174986	7.44552	0.285685	7.61919	0.13845	0.0767621	0.876601	-1.14077	Pre * Diabetic down vs Pre * Non-Diabetic	-2.0308	0.00058264	1.3042	1.3042	Post * Diabetic up vs Pre * Diabetic	5.48697	0.0289408	1.11882	1.11882	Post * Non-Diabetic up vs Pre * Non-Diabetic	2.65698	0.756349	1.02184	1.02184	Post * Diabetic up vs Post * Non-Diabetic	0.321119	34.5837	34.5837	0.908911	0.908911	1.32523	1.32523	5908.75	5908.75	5.69287	5.69287	1
11224	214756_x_at	5379	PMS2P1	postmeiotic segregation increased 2 pseudogene 1	NM_005394 /// NR_003613	0.009913	0.306353	0.125233	2.49356e-12	0.864132	7.7567	0.155192	7.78873	0.199023	7.55715	0.308262	7.63925	0.162649	0.33197	0.926535	-1.07929	Pre * Diabetic down vs Pre * Non-Diabetic	-1.03266	0.0470564	1.14834	1.14834	Post * Diabetic up vs Pre * Diabetic	2.34487	0.0414754	1.13258	1.13258	Post * Non-Diabetic up vs Pre * Non-Diabetic	2.42576	0.438904	0.939425	-1.06448	Post * Diabetic down vs Post * Non-Diabetic	-0.814547	11.2982	11.2982	1.16207	1.16207	2.93136	2.93136	4596.42	4596.42	0.0312246	0.0312246	1
6983	207018_s_at	5874	RAB27B	RAB27B, member RAS oncogene family	NM_004163	0.00351907	0.216136	0.00636633	4.11762e-11	0.090209	4.54524	0.223298	4.43544	0.217664	4.68145	0.21627	4.76374	0.109842	0.709045	0.976238	-1.02434	Pre * Diabetic down vs Pre * Non-Diabetic	-0.386723	0.193222	0.909908	-1.09901	Post * Diabetic down vs Pre * Diabetic	-1.42057	0.0017202	0.768674	-1.30094	Post * Non-Diabetic down vs Pre * Non-Diabetic	-4.61553	0.0546613	1.15561	1.15561	Post * Diabetic up vs Post * Non-Diabetic	2.2489	16.6716	16.6716	1.74335	1.74335	13.4233	13.4233	2276.52	2276.52	3.71133	3.71133	1
12956	218526_s_at	29098	RANGRF	RAN guanine nucleotide release factor	NM_001177801 /// NM_001177802 /// NM_016492	0.000841092	0.254474	0.0482357	1.31531e-11	0.00381907	6.71097	0.278433	6.41586	0.117148	5.982	0.272983	6.3674	0.264261	0.00649351	0.74458	-1.34304	Pre * Diabetic down vs Pre * Non-Diabetic	-3.65009	0.00029977	1.65746	1.65746	Post * Diabetic up vs Pre * Diabetic	6.06833	0.400405	1.06559	1.06559	Post * Non-Diabetic up vs Pre * Non-Diabetic	0.88809	0.117395	1.15814	1.15814	Post * Diabetic up vs Post * Non-Diabetic	1.75467	26.8491	26.8491	1.46166	1.46166	5.42432	5.42432	3030.52	3030.52	16.1937	16.1937	1
16909	225396_at	5928	RBBP4	retinoblastoma binding protein 4	NM_001135255 /// NM_001135256 /// NM_005610	0.00949924	0.82335	0.502024	1.48806e-11	0.981631	6.88563	0.282581	6.83585	0.0593345	6.65466	0.244256	6.62157	0.140785	0.863453	1.01436	1.01436	Pre * Diabetic up vs Pre * Non-Diabetic	0.177599	0.0539212	1.17363	1.17363	Post * Diabetic up vs Pre * Diabetic	2.25763	0.0330431	1.17101	1.17101	Post * Non-Diabetic up vs Pre * Non-Diabetic	2.57164	0.84817	1.01663	1.01663	Post * Diabetic up vs Post * Non-Diabetic	0.197754	11.4924	11.4924	0.0525226	0.0525226	0.494146	0.494146	2938.24	2938.24	0.000564221	0.000564221	1
11813	216215_s_at	23543	RBFOX2	RNA binding protein, fox-1 homolog (C. elegans) 2	NM_001031695 /// NM_001082576 /// NM_001082577 /// NM_001082578 /// NM_001082579 /// NM	0.00634687	0.409244	0.00976394	8.64395e-13	0.54239	9.78506	0.353961	9.68007	0.145669	9.40168	0.355156	9.47664	0.201913	0.311483	0.909564	-1.09943	Pre * Diabetic down vs Pre * Non-Diabetic	-1.08033	0.0220193	1.30439	1.30439	Post * Diabetic up vs Pre * Diabetic	2.83385	0.0483974	1.20579	1.20579	Post * Non-Diabetic up vs Pre * Non-Diabetic	2.32687	0.862821	0.98394	-1.01632	Post * Diabetic down vs Post * Non-Diabetic	-0.17843	13.4389	13.4389	0.741857	0.741857	11.367	11.367	5992.46	5992.46	0.404803	0.404803	1
23110	238736_at	5980	REV3L	REV3-like, catalytic subunit of DNA polymerase zeta (yeast)	NM_002912	0.00883413	0.057891	0.196198	0.353155	0.369203	7.52057	0.190683	7.56043	0.278363	6.80438	0.493491	7.21172	0.332727	0.0466035	0.724134	-1.38096	Pre * Diabetic down vs Pre * Non-Diabetic	-2.35107	0.00860484	1.77985	1.77985	Post * Diabetic up vs Pre * Diabetic	3.45707	0.0577056	1.47629	1.47629	Post * Non-Diabetic up vs Pre * Non-Diabetic	2.21416	0.400529	0.873032	-1.14543	Post * Diabetic down vs Post * Non-Diabetic	-0.887846	11.8281	11.8281	4.58591	4.58591	1.98825	1.98825	0.971584	0.971584	0.905374	0.905374	1
2907	200868_s_at	55905	RNF114	ring finger protein 114	NM_018683	0.00471458	0.0127801	0.15565	5.03247e-12	0.0315671	7.78212	0.137231	7.77208	0.220561	7.21809	0.467707	7.69144	0.208447	0.0036718	0.706404	-1.41562	Pre * Diabetic down vs Pre * Non-Diabetic	-4.05243	0.00274217	1.4784	1.4784	Post * Diabetic up vs Pre * Diabetic	4.26515	0.356868	1.07989	1.07989	Post * Non-Diabetic up vs Pre * Non-Diabetic	0.977679	0.715719	0.967083	-1.03404	Post * Diabetic down vs Post * Non-Diabetic	-0.377362	15.0079	15.0079	9.15222	9.15222	2.45683	2.45683	3855.22	3855.22	6.76537	6.76537	1
20751	232100_at	154214	RNF217	ring finger protein 217	NM_152553	0.00247056	0.723125	0.0407063	6.18443e-11	0.630803	5.4116	0.257068	5.25973	0.119155	5.10885	0.313667	5.06422	0.127866	0.978697	1.00212	1.00212	Pre * Diabetic up vs Pre * Non-Diabetic	0.0275491	0.0125266	1.2335	1.2335	Post * Diabetic up vs Pre * Diabetic	3.20454	0.0189215	1.18122	1.18122	Post * Non-Diabetic up vs Pre * Non-Diabetic	2.93264	0.584723	1.04647	1.04647	Post * Diabetic up vs Post * Non-Diabetic	0.569386	18.856	18.856	0.132809	0.132809	5.94269	5.94269	2055.71	2055.71	0.249603	0.249603	1
8878	210931_at	6049	RNF6	ring finger protein (C3H2C3 type) 6	NM_005977 /// NM_183043 /// NM_183044 /// NM_183045	0.00540547	0.0615518	0.0334685	0.0147441	0.00246065	3.9727	0.305994	3.45244	0.467509	3.77587	0.235342	4.16231	0.405654	0.180172	0.83047	-1.20414	Pre * Diabetic down vs Pre * Non-Diabetic	-1.46844	0.551754	0.908957	-1.10016	Post * Diabetic down vs Pre * Diabetic	-0.621199	0.000613853	0.413818	-2.41652	Post * Non-Diabetic down vs Pre * Non-Diabetic	-5.44291	0.0027403	1.82414	1.82414	Post * Diabetic up vs Post * Non-Diabetic	4.26565	14.2714	14.2714	4.43126	4.43126	6.57111	6.57111	9.58819	9.58819	18.882	18.882	1
19788	229563_s_at	4736	RPL10A	ribosomal protein L10a	NM_007104	0.00394394	0.920916	0.579262	1.76721e-14	0.347216	12.4564	0.217399	12.4139	0.0941101	12.276	0.27032	12.3139	0.0729768	0.659274	0.968849	-1.03215	Pre * Diabetic down vs Pre * Non-Diabetic	-0.457799	0.010227	1.13318	1.13318	Post * Diabetic up vs Pre * Diabetic	3.34028	0.0534374	1.07797	1.07797	Post * Non-Diabetic up vs Pre * Non-Diabetic	2.26341	0.803529	1.01847	1.01847	Post * Diabetic up vs Post * Non-Diabetic	0.257183	16.0085	16.0085	0.0103664	0.0103664	0.333912	0.333912	15859.3	15859.3	0.997269	0.997269	1
11010	214271_x_at	6136	RPL12	ribosomal protein L12	NM_000976	0.00258369	0.873363	0.230952	6.59441e-14	0.323432	11.3071	0.195997	11.2332	0.0733994	11.0591	0.277723	11.1032	0.17243	0.539893	0.957079	-1.04485	Pre * Diabetic down vs Pre * Non-Diabetic	-0.640278	0.00736838	1.18754	1.18754	Post * Diabetic up vs Pre * Diabetic	3.56301	0.0385874	1.11006	1.11006	Post * Non-Diabetic up vs Pre * Non-Diabetic	2.47204	0.748154	1.02388	1.02388	Post * Diabetic up vs Post * Non-Diabetic	0.332366	18.5686	18.5686	0.0267405	0.0267405	1.68089	1.68089	11408.7	11408.7	1.10721	1.10721	1
7731	208929_x_at	606500 /// 6137	RPL13 /// SNORD68	ribosomal protein L13 /// small nucleolar RNA, C/D box 68	NM_000977 /// NM_001243130 /// NM_001243131 /// NM_033251 /// NR_002450	0.000925899	0.875458	0.948846	3.01409e-14	0.977432	11.9013	0.194379	11.8886	0.133648	11.7185	0.216466	11.7027	0.158844	0.874387	1.01163	1.01163	Pre * Diabetic up vs Pre * Non-Diabetic	0.163228	0.00947535	1.1351	1.1351	Post * Diabetic up vs Pre * Diabetic	3.39175	0.00476229	1.13676	1.13676	Post * Non-Diabetic up vs Pre * Non-Diabetic	3.86688	0.893117	1.01016	1.01016	Post * Diabetic up vs Post * Non-Diabetic	0.138698	26.0452	26.0452	0.0258544	0.0258544	0.00438202	0.00438202	13876.8	13876.8	0.000851794	0.000851794	1
11048	214351_x_at	606500 /// 6137	RPL13 /// SNORD68	ribosomal protein L13 /// small nucleolar RNA, C/D box 68	NM_000977 /// NM_001243130 /// NM_001243131 /// NM_033251 /// NR_002450	0.000986663	0.862721	0.573697	3.16744e-14	0.745919	11.7551	0.152591	11.7677	0.123675	11.5539	0.232239	11.5466	0.110651	0.992872	0.9994	-1.0006	Pre * Diabetic down vs Pre * Non-Diabetic	-0.00921648	0.0138772	1.14965	1.14965	Post * Diabetic up vs Pre * Diabetic	3.13656	0.00350562	1.17269	1.17269	Post * Non-Diabetic up vs Pre * Non-Diabetic	4.08586	0.769469	0.979771	-1.02065	Post * Diabetic down vs Post * Non-Diabetic	-0.303204	25.5238	25.5238	0.0314778	0.0314778	0.34401	0.34401	13705.6	13705.6	0.112522	0.112522	1
9488	212191_x_at	606500 /// 6137	RPL13 /// SNORD68	ribosomal protein L13 /// small nucleolar RNA, C/D box 68	NM_000977 /// NM_001243130 /// NM_001243131 /// NM_033251 /// NR_002450	0.00290262	0.423124	0.501443	9.78754e-14	0.703875	11.7178	0.190738	11.7539	0.13809	11.4795	0.254092	11.5685	0.165006	0.37504	0.932792	-1.07205	Pre * Diabetic down vs Pre * Non-Diabetic	-0.939356	0.0154318	1.1796	1.1796	Post * Diabetic up vs Pre * Diabetic	3.06641	0.019614	1.14681	1.14681	Post * Non-Diabetic up vs Pre * Non-Diabetic	2.90917	0.604679	0.95946	-1.04225	Post * Diabetic down vs Post * Non-Diabetic	-0.538816	17.8365	17.8365	0.697516	0.697516	0.495531	0.495531	10335.6	10335.6	0.155236	0.155236	1
9969	212734_x_at	606500 /// 6137	RPL13 /// SNORD68	ribosomal protein L13 /// small nucleolar RNA, C/D box 68	NM_000977 /// NM_001243130 /// NM_001243131 /// NM_033251 /// NR_002450	0.00292866	0.708506	0.575651	1.25721e-14	0.852227	12.2029	0.160969	12.2262	0.11833	12.0513	0.201353	12.0681	0.142827	0.79121	0.983321	-1.01696	Pre * Diabetic down vs Pre * Non-Diabetic	-0.273752	0.0279259	1.11082	1.11082	Post * Diabetic up vs Pre * Diabetic	2.68	0.0102662	1.12203	1.12203	Post * Non-Diabetic up vs Pre * Non-Diabetic	3.3377	0.683523	0.97349	-1.02723	Post * Diabetic down vs Post * Non-Diabetic	-0.422877	17.7812	17.7812	0.148004	0.148004	0.340441	0.340441	17269.2	17269.2	0.037016	0.037016	1
10141	212933_x_at	606500 /// 6137	RPL13 /// SNORD68	ribosomal protein L13 /// small nucleolar RNA, C/D box 68	NM_000977 /// NM_001243130 /// NM_001243131 /// NM_033251 /// NR_002450	0.00350901	0.804048	0.429011	8.95037e-15	0.950868	12.0493	0.16632	12.0129	0.0742748	11.8765	0.193372	11.8457	0.110219	0.805012	1.01434	1.01434	Pre * Diabetic up vs Pre * Non-Diabetic	0.255193	0.0285889	1.12721	1.12721	Post * Diabetic up vs Pre * Diabetic	2.66487	0.0133747	1.13149	1.13149	Post * Non-Diabetic up vs Pre * Non-Diabetic	3.16101	0.861312	1.0105	1.0105	Post * Diabetic up vs Post * Non-Diabetic	0.180417	16.6885	16.6885	0.0649181	0.0649181	0.693889	0.693889	18800.9	18800.9	0.0040419	0.0040419	1
8757	210646_x_at	23521 /// 26816 /// 26817 /// 26818 /// 26819 /// 728658	RPL13A /// RPL13AP5 /// SNORD32A /// SNORD33 /// SNORD34 /// SNORD35A	ribosomal protein L13a /// ribosomal protein L13a pseudogene 5 /// small nucleolar RNA,	NM_012423 /// NR_000018 /// NR_000019 /// NR_000020 /// NR_000021 /// NR_026712	0.00830415	0.30835	0.196813	3.79663e-14	0.22093	12.7503	0.173131	12.7268	0.0620155	12.4855	0.345713	12.6321	0.0792695	0.139242	0.889549	-1.12417	Pre * Diabetic down vs Pre * Non-Diabetic	-1.64188	0.0128739	1.2015	1.2015	Post * Diabetic up vs Pre * Diabetic	3.18635	0.139415	1.08569	1.08569	Post * Non-Diabetic up vs Pre * Non-Diabetic	1.64105	0.837529	0.984443	-1.0158	Post * Diabetic down vs Post * Non-Diabetic	-0.211841	12.1192	12.1192	1.15199	1.15199	1.98217	1.98217	13098.3	13098.3	1.76262	1.76262	1
2581	200038_s_at	100526842 /// 6139	RPL17 /// RPL17-C18ORF32	ribosomal protein L17 /// RPL17-C18orf32 readthrough	NM_000985 /// NM_001035006 /// NM_001199340 /// NM_001199341 /// NM_001199342 /// NM_00	0.00811561	0.0605939	0.230046	4.98963e-14	0.094867	12.2044	0.101639	12.1858	0.0379287	11.7928	0.388738	12.0854	0.104945	0.0203319	0.804951	-1.24231	Pre * Diabetic down vs Pre * Non-Diabetic	-2.88573	0.00749945	1.33022	1.33022	Post * Diabetic up vs Pre * Diabetic	3.55091	0.253201	1.08856	1.08856	Post * Non-Diabetic up vs Pre * Non-Diabetic	1.23123	0.83737	0.983647	-1.01663	Post * Diabetic down vs Post * Non-Diabetic	-0.212051	12.2285	12.2285	4.47061	4.47061	1.68807	1.68807	12233	12233	3.58654	3.58654	1
2546	200003_s_at	6158	RPL28	ribosomal protein L28	NM_000991 /// NM_001136134 /// NM_001136135 /// NM_001136136 /// NM_001136137	0.000368479	0.314682	0.238352	3.21295e-14	0.423636	11.6491	0.179292	11.6604	0.104137	11.342	0.30044	11.4494	0.13153	0.210823	0.916836	-1.09071	Pre * Diabetic down vs Pre * Non-Diabetic	-1.3603	0.00209775	1.2372	1.2372	Post * Diabetic up vs Pre * Diabetic	4.46476	0.00500235	1.17292	1.17292	Post * Non-Diabetic up vs Pre * Non-Diabetic	3.83219	0.626888	0.967085	-1.03403	Post * Diabetic down vs Post * Non-Diabetic	-0.505425	34.6173	34.6173	1.12064	1.12064	1.62363	1.62363	13656.8	13656.8	0.710899	0.710899	1
2805	200763_s_at	6176	RPLP1	ribosomal protein, large, P1	NM_001003 /// NM_213725	0.00422169	0.686641	0.202357	5.59193e-17	0.254207	12.9626	0.0835574	12.9349	0.0379915	12.8542	0.131756	12.8884	0.0792346	0.383668	0.970067	-1.03086	Pre * Diabetic down vs Pre * Non-Diabetic	-0.921642	0.00872569	1.07806	1.07806	Post * Diabetic up vs Pre * Diabetic	3.44759	0.0729044	1.04031	1.04031	Post * Non-Diabetic up vs Pre * Non-Diabetic	2.06401	0.881465	1.00527	1.00527	Post * Diabetic up vs Post * Non-Diabetic	0.153946	15.6216	15.6216	0.172535	0.172535	1.92854	1.92854	66890.9	66890.9	1.50896	1.50896	1
2946	200909_s_at	6181 /// 619565	RPLP2 /// SNORA52	ribosomal protein, large, P2 /// small nucleolar RNA, H/ACA box 52	NM_001004 /// NR_002585	0.00727961	0.100148	0.100073	2.67357e-14	0.233191	12.2315	0.237836	12.2805	0.124951	12.0181	0.269354	12.2092	0.100758	0.0559026	0.859868	-1.16297	Pre * Diabetic down vs Pre * Non-Diabetic	-2.23451	0.0119994	1.15935	1.15935	Post * Diabetic up vs Pre * Diabetic	3.23319	0.121897	1.07187	1.07187	Post * Non-Diabetic up vs Pre * Non-Diabetic	1.72992	0.330313	0.93005	-1.07521	Post * Diabetic down vs Post * Non-Diabetic	-1.03643	12.7544	12.7544	3.28174	3.28174	3.45616	3.45616	14299.2	14299.2	1.6633	1.6633	1
2638	200095_x_at	6204	RPS10	ribosomal protein S10	NM_001014 /// NM_001203245 /// NM_001204091	0.00451591	0.662548	0.648757	1.07444e-14	0.903773	12.3228	0.223229	12.3527	0.127026	12.1887	0.125259	12.2162	0.115906	0.719638	0.977087	-1.02345	Pre * Diabetic down vs Pre * Non-Diabetic	-0.371882	0.0357554	1.09736	1.09736	Post * Diabetic up vs Pre * Diabetic	2.52096	0.0159641	1.10412	1.10412	Post * Non-Diabetic up vs Pre * Non-Diabetic	3.04407	0.660708	0.971112	-1.02975	Post * Diabetic down vs Post * Non-Diabetic	-0.455718	15.2451	15.2451	0.202191	0.202191	0.223857	0.223857	17961.2	17961.2	0.015571	0.015571	1
3631	201665_x_at	100505503 /// 6218	RPS17 /// RPS17L	ribosomal protein S17 /// ribosomal protein S17-like	NM_001021 /// NM_001199057	0.00933353	0.198659	0.0809364	8.21568e-14	0.462636	11.7467	0.161058	11.7426	0.0879418	11.4571	0.375766	11.5949	0.114223	0.152135	0.888781	-1.12514	Pre * Diabetic down vs Pre * Non-Diabetic	-1.58276	0.0249056	1.22227	1.22227	Post * Diabetic up vs Pre * Diabetic	2.75397	0.0786156	1.13486	1.13486	Post * Non-Diabetic up vs Pre * Non-Diabetic	2.01541	0.587056	0.957236	-1.04467	Post * Diabetic down vs Post * Non-Diabetic	-0.565783	11.5733	11.5733	1.89516	1.89516	3.98657	3.98657	10798.3	10798.3	0.59508	0.59508	1
9705	212433_x_at	26784 /// 6187	RPS2 /// SNORA64	ribosomal protein S2 /// small nucleolar RNA, H/ACA box 64	NM_002952 /// NR_002326	0.00439173	0.299061	0.702781	7.73284e-14	0.196381	11.9409	0.146922	11.9244	0.142729	11.5789	0.317467	11.7606	0.0702917	0.114765	0.877788	-1.13923	Pre * Diabetic down vs Pre * Non-Diabetic	-1.76955	0.0078404	1.28524	1.28524	Post * Diabetic up vs Pre * Diabetic	3.52048	0.0902452	1.12561	1.12561	Post * Non-Diabetic up vs Pre * Non-Diabetic	1.92622	0.976998	1.00228	1.00228	Post * Diabetic up vs Post * Non-Diabetic	0.0297462	15.4002	15.4002	1.19969	1.19969	0.156454	0.156454	10963.1	10963.1	1.98643	1.98643	1
4845	203107_x_at	26784 /// 6187	RPS2 /// SNORA64	ribosomal protein S2 /// small nucleolar RNA, H/ACA box 64	NM_002952 /// NR_002326	0.00728532	0.531047	0.971303	9.83756e-14	0.206487	12.172	0.189498	12.1394	0.11541	11.848	0.324584	11.9962	0.0608472	0.211813	0.901971	-1.10868	Pre * Diabetic down vs Pre * Non-Diabetic	-1.35704	0.0113735	1.2518	1.2518	Post * Diabetic up vs Pre * Diabetic	3.26898	0.131717	1.10487	1.10487	Post * Non-Diabetic up vs Pre * Non-Diabetic	1.67875	0.790519	1.02192	1.02192	Post * Diabetic up vs Post * Non-Diabetic	0.274684	12.7505	12.7505	0.421019	0.421019	0.00137747	0.00137747	10322.4	10322.4	1.88988	1.88988	1
2784	200741_s_at	6232	RPS27	ribosomal protein S27	NM_001030	0.00654483	0.508147	0.596509	3.70114e-15	0.338813	12.768	0.106665	12.7634	0.0839234	12.5916	0.19507	12.6709	0.114529	0.298529	0.942286	-1.06125	Pre * Diabetic down vs Pre * Non-Diabetic	-1.11177	0.0147784	1.13006	1.13006	Post * Diabetic up vs Pre * Diabetic	3.09495	0.0808975	1.07134	1.07134	Post * Non-Diabetic up vs Pre * Non-Diabetic	1.99695	0.915322	0.993932	-1.0061	Post * Diabetic down vs Post * Non-Diabetic	-0.109736	13.2834	13.2834	0.470956	0.470956	0.303892	0.303892	23447	23447	1.03478	1.03478	1
7709	208904_s_at	6234	RPS28	ribosomal protein S28	NM_001031	0.00467208	0.996233	0.806632	2.92936e-15	0.46573	12.2497	0.245127	12.227	0.0765783	12.1403	0.193459	12.1563	0.0760646	0.844794	0.987273	-1.01289	Pre * Diabetic down vs Pre * Non-Diabetic	-0.202218	0.014205	1.07884	1.07884	Post * Diabetic up vs Pre * Diabetic	3.1211	0.0480187	1.05218	1.05218	Post * Non-Diabetic up vs Pre * Non-Diabetic	2.3319	0.854654	1.01228	1.01228	Post * Diabetic up vs Post * Non-Diabetic	0.189192	15.0576	15.0576	2.34341e-05	2.34341e-05	0.0640201	0.0640201	24859.1	24859.1	0.586606	0.586606	1
10448	213347_x_at	6191	RPS4X	ribosomal protein S4, X-linked	NM_001007	0.0092622	0.503816	0.147304	7.65135e-15	0.698852	12.0548	0.173521	12.0415	0.0676707	11.8775	0.21549	11.9228	0.100251	0.439368	0.955987	-1.04604	Pre * Diabetic down vs Pre * Non-Diabetic	-0.81369	0.0358892	1.13072	1.13072	Post * Diabetic up vs Pre * Diabetic	2.51856	0.0507607	1.10183	1.10183	Post * Non-Diabetic up vs Pre * Non-Diabetic	2.29633	0.747631	0.981049	-1.01932	Post * Diabetic down vs Post * Non-Diabetic	-0.333085	11.6086	11.6086	0.480871	0.480871	2.57394	2.57394	19552.8	19552.8	0.160875	0.160875	1
2969	200933_x_at	6191	RPS4X	ribosomal protein S4, X-linked	NM_001007	0.00992454	0.215553	0.111861	7.29004e-14	0.323306	12.2993	0.200301	12.2954	0.0372433	12.0314	0.37804	12.1872	0.0947096	0.124506	0.879319	-1.13724	Pre * Diabetic down vs Pre * Non-Diabetic	-1.71596	0.0192625	1.20407	1.20407	Post * Diabetic up vs Pre * Diabetic	2.92097	0.116252	1.102	1.102	Post * Non-Diabetic up vs Pre * Non-Diabetic	1.7611	0.620996	0.960767	-1.04083	Post * Diabetic down vs Post * Non-Diabetic	-0.514222	11.2929	11.2929	1.74815	1.74815	3.19105	3.19105	11126.1	11126.1	1.10782	1.10782	1
3262	201254_x_at	6194	RPS6	ribosomal protein S6	NM_001010	0.00480535	0.10187	0.253415	5.10117e-14	0.172502	12.0618	0.183177	12.1057	0.0622916	11.7843	0.335957	12.0038	0.100751	0.0464226	0.847616	-1.17978	Pre * Diabetic down vs Pre * Non-Diabetic	-2.35356	0.00746306	1.21208	1.21208	Post * Diabetic up vs Pre * Diabetic	3.55425	0.109933	1.0885	1.0885	Post * Non-Diabetic up vs Pre * Non-Diabetic	1.79773	0.450832	0.943848	-1.05949	Post * Diabetic down vs Post * Non-Diabetic	-0.792676	14.9037	14.9037	3.24394	3.24394	1.51445	1.51445	12165.5	12165.5	2.24411	2.24411	1
10834	213941_x_at	6201	RPS7	ribosomal protein S7	NM_001011	0.00738494	0.720195	0.779549	2.90268e-14	0.150133	11.9325	0.123603	11.8951	0.160745	11.6877	0.120727	11.7972	0.155358	0.28484	0.929579	-1.07576	Pre * Diabetic down vs Pre * Non-Diabetic	-1.1462	0.00912682	1.1849	1.1849	Post * Diabetic up vs Pre * Diabetic	3.41711	0.172146	1.067	1.067	Post * Non-Diabetic up vs Pre * Non-Diabetic	1.49944	0.643694	1.03229	1.03229	Post * Diabetic up vs Post * Non-Diabetic	0.480562	12.684	12.684	0.135779	0.135779	0.0838185	0.0838185	14008.2	14008.2	2.53329	2.53329	1
10747	213801_x_at	388524 /// 3921 /// 574040 /// 6044 /// 653162 /// 730029	RPSA /// RPSAP19 /// RPSAP58 /// RPSAP9 /// SNORA6 /// SNORA62	ribosomal protein SA /// ribosomal protein SA pseudogene 19 /// ribosomal protein SA ps	NM_001005472 /// NM_001012321 /// NM_002295 /// NR_002324 /// NR_002325 /// NR_003662 /	0.00108419	0.845512	0.59681	4.95281e-14	0.350792	11.6949	0.161504	11.6526	0.156875	11.4575	0.16134	11.4855	0.167216	0.848593	0.986099	-1.0141	Pre * Diabetic down vs Pre * Non-Diabetic	-0.197195	0.00405462	1.17888	1.17888	Post * Diabetic up vs Pre * Diabetic	3.98125	0.0168138	1.11619	1.11619	Post * Non-Diabetic up vs Pre * Non-Diabetic	3.00999	0.594003	1.04149	1.04149	Post * Diabetic up vs Post * Non-Diabetic	0.5551	24.7659	24.7659	0.0399883	0.0399883	0.303385	0.303385	12255.7	12255.7	0.981721	0.981721	1
24378	242297_at	6239	RREB1	ras responsive element binding protein 1	NM_001003698 /// NM_001003699 /// NM_001003700 /// NM_001168344 /// NM_002955	0.00723051	0.25379	0.868378	1.16874e-10	0.432394	5.81536	0.149519	5.63166	0.16135	5.41428	0.30051	5.37774	0.213575	0.766585	1.02793	1.02793	Pre * Diabetic up vs Pre * Non-Diabetic	0.307133	0.0198905	1.3205	1.3205	Post * Diabetic up vs Pre * Diabetic	2.90004	0.067709	1.18959	1.18959	Post * Non-Diabetic up vs Pre * Non-Diabetic	2.11156	0.192692	1.14105	1.14105	Post * Diabetic up vs Post * Non-Diabetic	1.42246	12.7876	12.7876	1.46617	1.46617	0.0292824	0.0292824	1752.24	1752.24	0.683363	0.683363	1
17934	226619_at	29843	SENP1	SUMO1/sentrin specific peptidase 1	NM_001267594 /// NM_001267595 /// NM_014554 /// NR_051991 /// NR_051992	7.43228e-05	0.244342	0.000642614	1.29167e-11	0.0212192	4.91316	0.353402	4.66895	0.242531	4.26527	0.324819	4.45657	0.143929	0.0192844	0.834317	-1.19859	Pre * Diabetic down vs Pre * Non-Diabetic	-2.92023	0.000141516	1.56687	1.56687	Post * Diabetic up vs Pre * Diabetic	6.77411	0.00797961	1.22077	1.22077	Post * Non-Diabetic up vs Pre * Non-Diabetic	3.50846	0.317032	1.07086	1.07086	Post * Diabetic up vs Post * Non-Diabetic	1.06718	55.1461	55.1461	1.53022	1.53022	29.2078	29.2078	3044.32	3044.32	8.1677	8.1677	1
19498	228990_at	677825 /// 677838 /// 692073 /// 85028	SNHG12 /// SNORA16A /// SNORA44 /// SNORA61	small nucleolar RNA host gene 12 (non-protein coding) /// small nucleolar RNA, H/ACA bo	NM_053040 /// NR_002976 /// NR_002987 /// NR_003035 /// NR_024127	0.00281793	0.590415	0.432544	9.73872e-12	0.299408	5.53384	0.0857307	5.40068	0.113872	5.18476	0.273814	5.20821	0.139503	0.718929	0.97635	-1.02422	Pre * Diabetic down vs Pre * Non-Diabetic	-0.372872	0.00776415	1.27375	1.27375	Post * Diabetic up vs Pre * Diabetic	3.52716	0.0426316	1.15221	1.15221	Post * Non-Diabetic up vs Pre * Non-Diabetic	2.40814	0.283308	1.07934	1.07934	Post * Diabetic up vs Post * Non-Diabetic	1.15013	18.0207	18.0207	0.309167	0.309167	0.682899	0.682899	3267.56	3267.56	1.23121	1.23121	1
5107	203448_s_at	7013	TERF1	telomeric repeat binding factor (NIMA-interacting) 1	NM_003218 /// NM_017489	0.0049369	0.813161	0.125024	1.17853e-12	0.389129	7.40573	0.136573	7.27896	0.148374	7.09708	0.280174	7.11457	0.0665921	0.674236	0.971563	-1.02927	Pre * Diabetic down vs Pre * Non-Diabetic	-0.436183	0.0139654	1.23855	1.23855	Post * Diabetic up vs Pre * Diabetic	3.13236	0.0546605	1.14105	1.14105	Post * Non-Diabetic up vs Pre * Non-Diabetic	2.24891	0.460084	1.05458	1.05458	Post * Diabetic up vs Post * Non-Diabetic	0.77598	14.7569	14.7569	0.0588918	0.0588918	2.93513	2.93513	5545.05	5545.05	0.829154	0.829154	1
18957	228089_x_at	374395	TMEM179B	transmembrane protein 179B	NM_199337	0.00282663	0.117372	0.0990813	5.45172e-12	0.98721	6.74428	0.0824643	6.82783	0.136122	6.48327	0.344831	6.60052	0.0844862	0.191497	0.903333	-1.10701	Pre * Diabetic down vs Pre * Non-Diabetic	-1.42673	0.0226484	1.19832	1.19832	Post * Diabetic up vs Pre * Diabetic	2.81555	0.0120472	1.19663	1.19663	Post * Non-Diabetic up vs Pre * Non-Diabetic	3.23054	0.212379	0.904603	-1.10546	Post * Diabetic down vs Post * Non-Diabetic	-1.35519	18.0015	18.0015	2.93649	2.93649	3.4803	3.4803	3778.72	3778.72	0.000273493	0.000273493	1
11041	214327_x_at	7178	TPT1	tumor protein, translationally-controlled 1	NM_003295	0.0084925	0.872474	0.95598	1.30635e-16	0.0124314	12.4741	0.130788	12.536	0.0809302	12.5789	0.143005	12.5396	0.0575133	0.566427	1.02787	1.02787	Pre * Diabetic up vs Pre * Non-Diabetic	0.597925	0.00203134	0.929972	-1.0753	Post * Diabetic down vs Pre * Diabetic	-4.48904	0.852749	0.997216	-1.00279	Post * Non-Diabetic down vs Pre * Non-Diabetic	-0.191706	0.391529	0.958557	-1.04323	Post * Diabetic down vs Post * Non-Diabetic	-0.905753	12.0132	12.0132	0.0271206	0.0271206	0.00324351	0.00324351	54104.3	54104.3	10.3017	10.3017	1
17442	226013_at	22906	TRAK1	trafficking protein, kinesin binding 1	NM_001042646 /// NM_001265608 /// NM_001265609 /// NM_001265610 /// NM_014965	0.00960343	0.820711	0.0342941	1.42396e-12	0.912041	5.84605	0.178131	5.89525	0.123923	5.98518	0.159662	5.99459	0.101247	0.799547	1.01334	1.01334	Pre * Diabetic up vs Pre * Non-Diabetic	0.262529	0.0492363	0.908068	-1.10124	Post * Diabetic down vs Pre * Diabetic	-2.31586	0.037396	0.913796	-1.09434	Post * Non-Diabetic down vs Pre * Non-Diabetic	-2.49216	0.897575	1.00699	1.00699	Post * Diabetic up vs Post * Non-Diabetic	0.132873	11.4425	11.4425	0.0541349	0.0541349	6.49107	6.49107	5288.59	5288.59	0.0129976	0.0129976	1
5514	203983_at	7257	TSNAX	translin-associated factor X	NM_005999	0.00644893	0.662854	0.000975577	2.77631e-13	0.044422	9.22341	0.301313	8.94026	0.171234	8.81998	0.443504	8.93776	0.093072	0.0910797	0.873902	-1.14429	Pre * Diabetic down vs Pre * Non-Diabetic	-1.92026	0.00405214	1.32265	1.32265	Post * Diabetic up vs Pre * Diabetic	3.98168	0.357653	1.06075	1.06075	Post * Non-Diabetic up vs Pre * Non-Diabetic	0.975994	0.271731	1.08967	1.08967	Post * Diabetic up vs Post * Non-Diabetic	1.18044	13.358	13.358	0.201795	0.201795	25.6159	25.6159	7962.42	7962.42	5.67288	5.67288	1
15111	222627_at	51542	VPS54	vacuolar protein sorting 54 homolog (S. cerevisiae)	NM_001005739 /// NM_016516	0.00172513	0.898343	0.00536823	5.35954e-12	0.227205	6.99048	0.24934	6.76814	0.193774	6.51814	0.428966	6.57132	0.175211	0.338907	0.923228	-1.08316	Pre * Diabetic down vs Pre * Non-Diabetic	-1.01703	0.00454196	1.38736	1.38736	Post * Diabetic up vs Pre * Diabetic	3.90042	0.0347866	1.20052	1.20052	Post * Non-Diabetic up vs Pre * Non-Diabetic	2.5386	0.448259	1.06691	1.06691	Post * Diabetic up vs Post * Non-Diabetic	0.79736	21.2829	21.2829	0.0171714	0.0171714	14.308	14.308	3794.89	3794.89	1.71086	1.71086	1
8103	209375_at	7508	XPC	xeroderma pigmentosum, complementation group C	NM_001145769 /// NM_004628 /// NR_027299	0.00725704	0.58132	0.00231855	9.01394e-12	0.0900325	6.61825	0.366261	6.53424	0.232167	6.5126	0.440503	6.26144	0.143092	0.148982	1.13018	1.13018	Pre * Diabetic up vs Pre * Non-Diabetic	1.59678	0.308081	1.07598	1.07598	Post * Diabetic up vs Pre * Diabetic	1.08849	0.00298894	1.27735	1.27735	Post * Non-Diabetic up vs Pre * Non-Diabetic	4.20185	0.55375	0.952007	-1.05041	Post * Diabetic down vs Post * Non-Diabetic	-0.618012	12.7696	12.7696	0.32479	0.32479	19.2693	19.2693	3331.49	3331.49	3.71623	3.71623	1
12736	218263_s_at	58486	ZBED5	zinc finger, BED-type containing 5	NM_001143667 /// NM_021211	0.00646474	0.162203	0.174637	4.37232e-13	0.0236936	9.06245	0.178245	8.71028	0.155827	8.62805	0.265951	8.67599	0.201604	0.506289	0.952367	-1.05002	Pre * Diabetic down vs Pre * Non-Diabetic	-0.695752	0.00281258	1.35135	1.35135	Post * Diabetic up vs Pre * Diabetic	4.24648	0.524892	1.04137	1.04137	Post * Non-Diabetic up vs Pre * Non-Diabetic	0.664772	0.0194814	1.23586	1.23586	Post * Diabetic up vs Post * Non-Diabetic	2.9136	13.3456	13.3456	2.27737	2.27737	2.21916	2.21916	7107.01	7107.01	7.7634	7.7634	1
16359	224782_at	153527	ZMAT2	zinc finger, matrin-type 2	NM_144723	0.000710158	0.282561	0.0192936	5.24842e-13	0.00823312	8.00029	0.233082	7.87983	0.141287	7.65214	0.308181	7.85018	0.031052	0.0365902	0.84803	-1.1792	Pre * Diabetic down vs Pre * Non-Diabetic	-2.50614	0.000374974	1.27293	1.27293	Post * Diabetic up vs Pre * Diabetic	5.86819	0.202717	1.05153	1.05153	Post * Non-Diabetic up vs Pre * Non-Diabetic	1.38749	0.709577	1.02659	1.02659	Post * Diabetic up vs Post * Non-Diabetic	0.385975	28.3133	28.3133	1.28985	1.28985	8.52594	8.52594	6789.49	6789.49	12.16	12.16	1
15962	224014_at	90338	ZNF160	zinc finger protein 160	NM_001102603 /// NM_033288 /// NM_198893	0.0031202	0.469204	0.633141	0.226486	0.873851	4.28777	0.245454	4.12757	0.207604	3.81195	0.278825	3.72303	0.237699	0.579093	1.05833	1.05833	Pre * Diabetic up vs Pre * Non-Diabetic	0.578114	0.00408859	1.51362	1.51362	Post * Diabetic up vs Pre * Diabetic	3.97528	0.0108499	1.48585	1.48585	Post * Non-Diabetic up vs Pre * Non-Diabetic	3.30055	0.514061	1.07811	1.07811	Post * Diabetic up vs Post * Non-Diabetic	0.682724	17.3926	17.3926	0.565968	0.565968	0.24615	0.24615	1.71669	1.71669	0.0268737	0.0268737	1
21308	233461_x_at	7769	ZNF226	zinc finger protein 226	NM_001032372 /// NM_001032373 /// NM_001032374 /// NM_001032375 /// NM_001146220 /// NM	0.00796645	0.45014	0.0454462	2.85342e-11	0.218875	6.12049	0.356497	5.8574	0.190351	5.73214	0.215174	5.72746	0.15682	0.764453	0.974946	-1.0257	Pre * Diabetic down vs Pre * Non-Diabetic	-0.31004	0.0127463	1.3089	1.3089	Post * Diabetic up vs Pre * Diabetic	3.19297	0.133648	1.12851	1.12851	Post * Non-Diabetic up vs Pre * Non-Diabetic	1.66911	0.18499	1.13079	1.13079	Post * Diabetic up vs Post * Non-Diabetic	1.45042	12.3172	12.3172	0.617658	0.617658	5.60353	5.60353	2495.81	2495.81	1.78002	1.78002	1
24926	243521_at	7789	ZXDA	zinc finger, X-linked, duplicated A	NM_007156	0.00698589	0.714555	0.075624	0.355415	0.119777	6.75773	0.216732	6.51722	0.23623	6.20625	0.259364	6.33645	0.275425	0.219336	0.877797	-1.13922	Pre * Diabetic down vs Pre * Non-Diabetic	-1.3327	0.002598	1.56144	1.56144	Post * Diabetic up vs Pre * Diabetic	4.30504	0.0687592	1.28522	1.28522	Post * Non-Diabetic up vs Pre * Non-Diabetic	2.10166	0.574272	1.06645	1.06645	Post * Diabetic up vs Post * Non-Diabetic	0.585624	12.9575	12.9575	0.141601	0.141601	4.16333	4.16333	0.96198	0.96198	3.0327	3.0327	1
